# Supplementary material for: Cryo-correlative light and electron tomography of dopaminergic axonal varicosities reveals non-synaptic modulation of cortico-striatal synapses
Source: Research Square preprint supplement (doi:10.21203/rs.3.rs-6081416/v1), 2025-04-21
Supplement: Supplementary file 1 [file 410dfea70ba176b08fd79aff.docx]

**
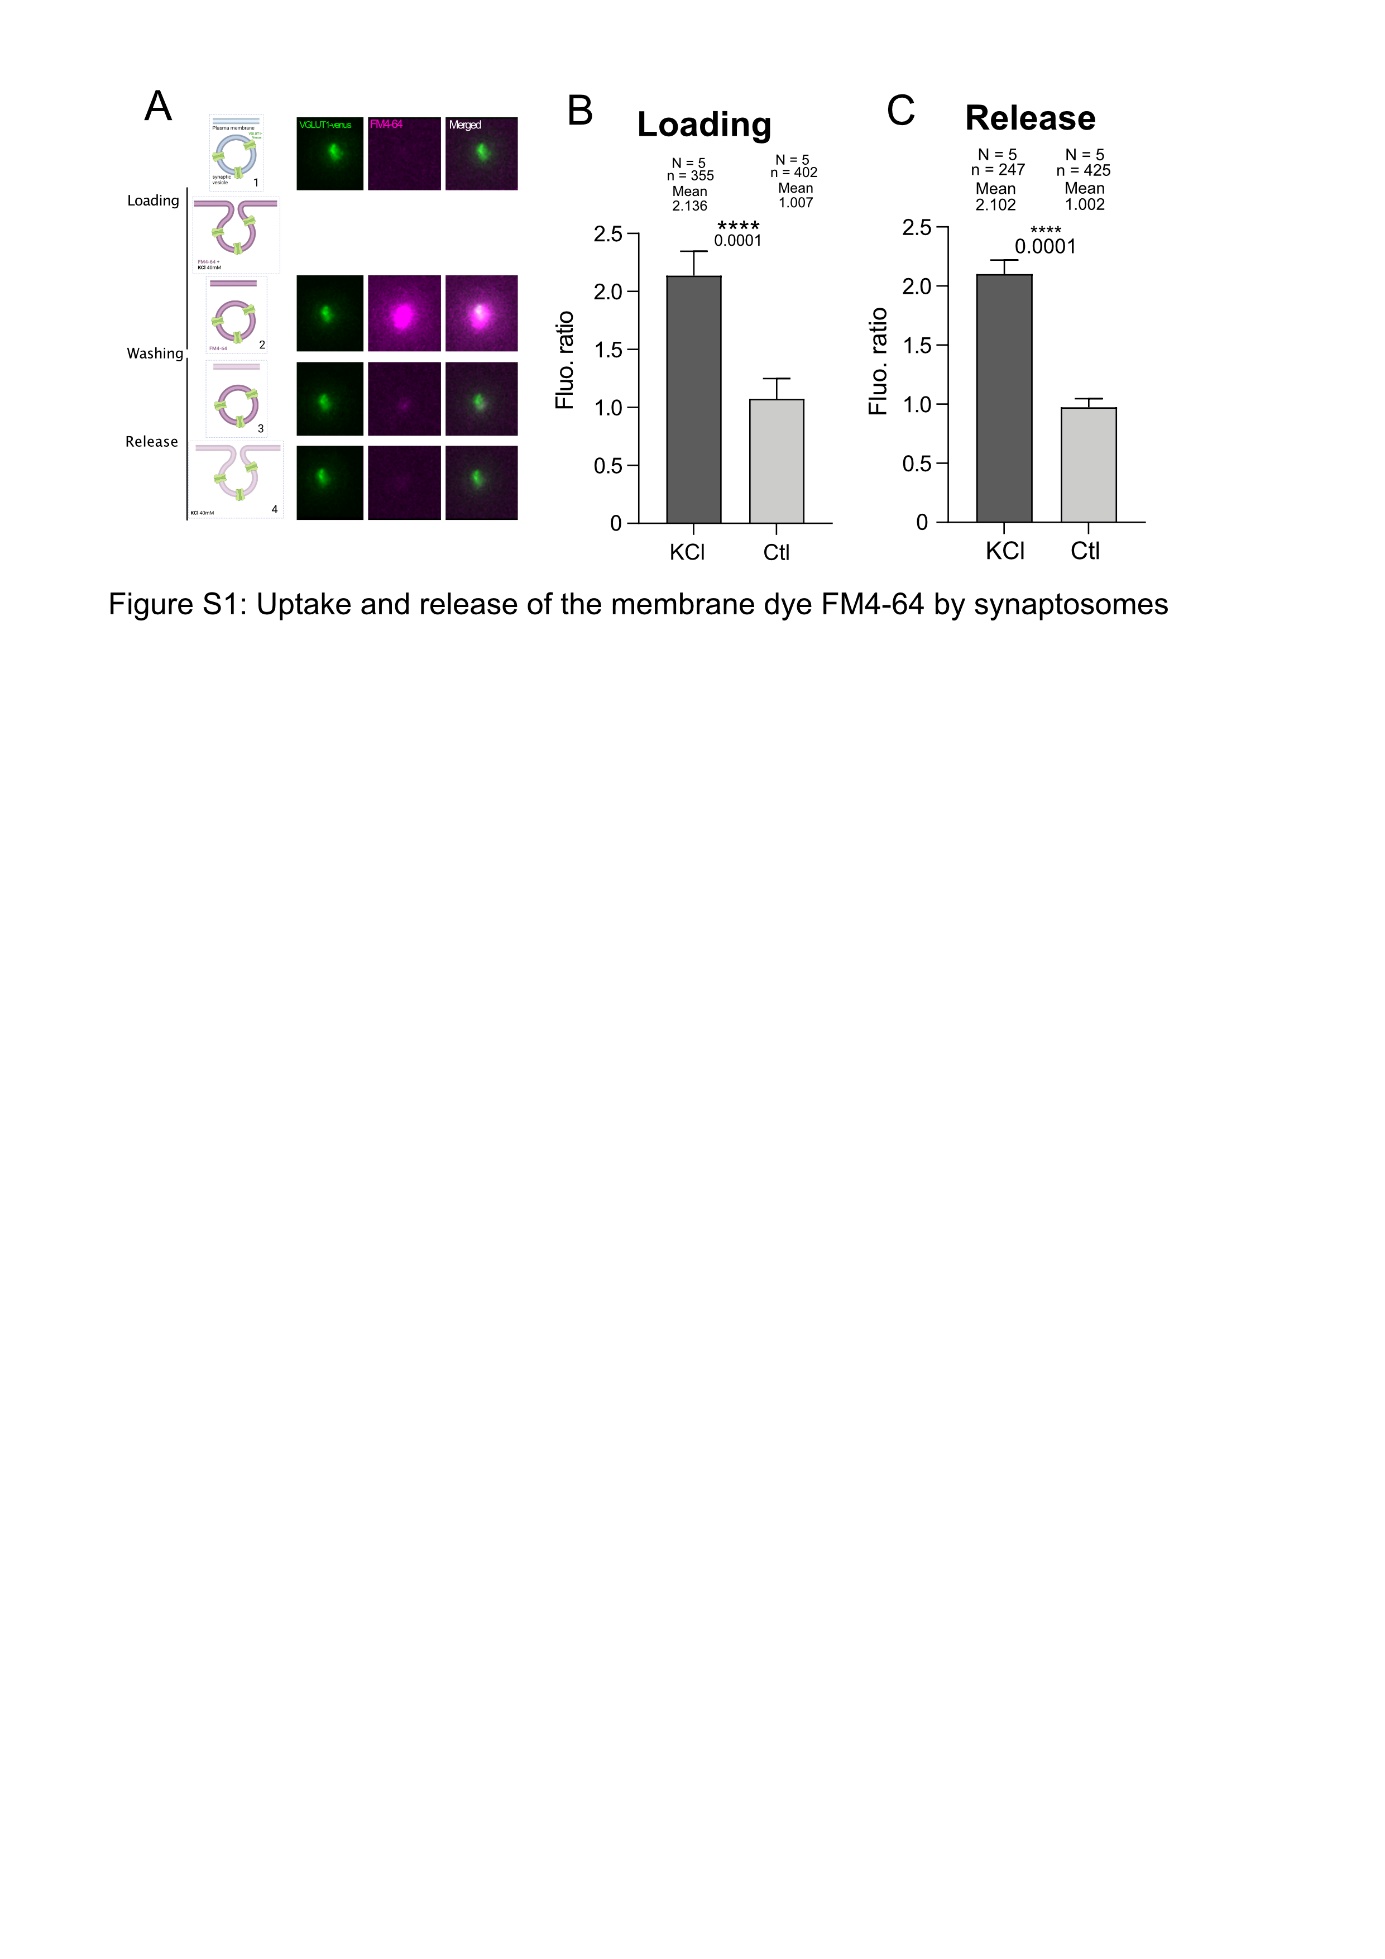
**

**Figure S1: Synaptic vesicle cycling in synaptosomes measured with FM4-64 uptake and release. A**, Scheme of the principle of FM assay in synaptosomes. A first image is acquired before adding the dye and corresponds to the background (1). FM4-64 is loaded into vesicles by triggering a first exo-endocytic cycle with 40 mM KCl and a second image is taken (2). After washing with HBK, only cycling vesicles remain stained by FM4-64 monitored by a third image (3). A second stimulation with 40 mM KCl induce release of the dye and is followed by washing with HBK and acquisition of a final image (4). A control experiment is performed without KCl depolarization for loading to monitor unspecific dye labelling. **B**, Violin plot showing the distribution of loading values (acq. 3 intensity - acq. 1 intensity) normalized to the control. On average the loading signal is 2.136 times higher upon stimulation with KCl (dark grey) which correspond to synaptosomes that have loaded the dye (Mann-Whitney; p-value < 0.0001). **C**, Violin plot showing the distribution of release values (acq. 3 – acq. 4) after stimulation (dark grey) normalized to the control (light grey). Destaining averages 2.102 times higher than the mean value of control (Mann-Whitney; p-value < 0.0001).


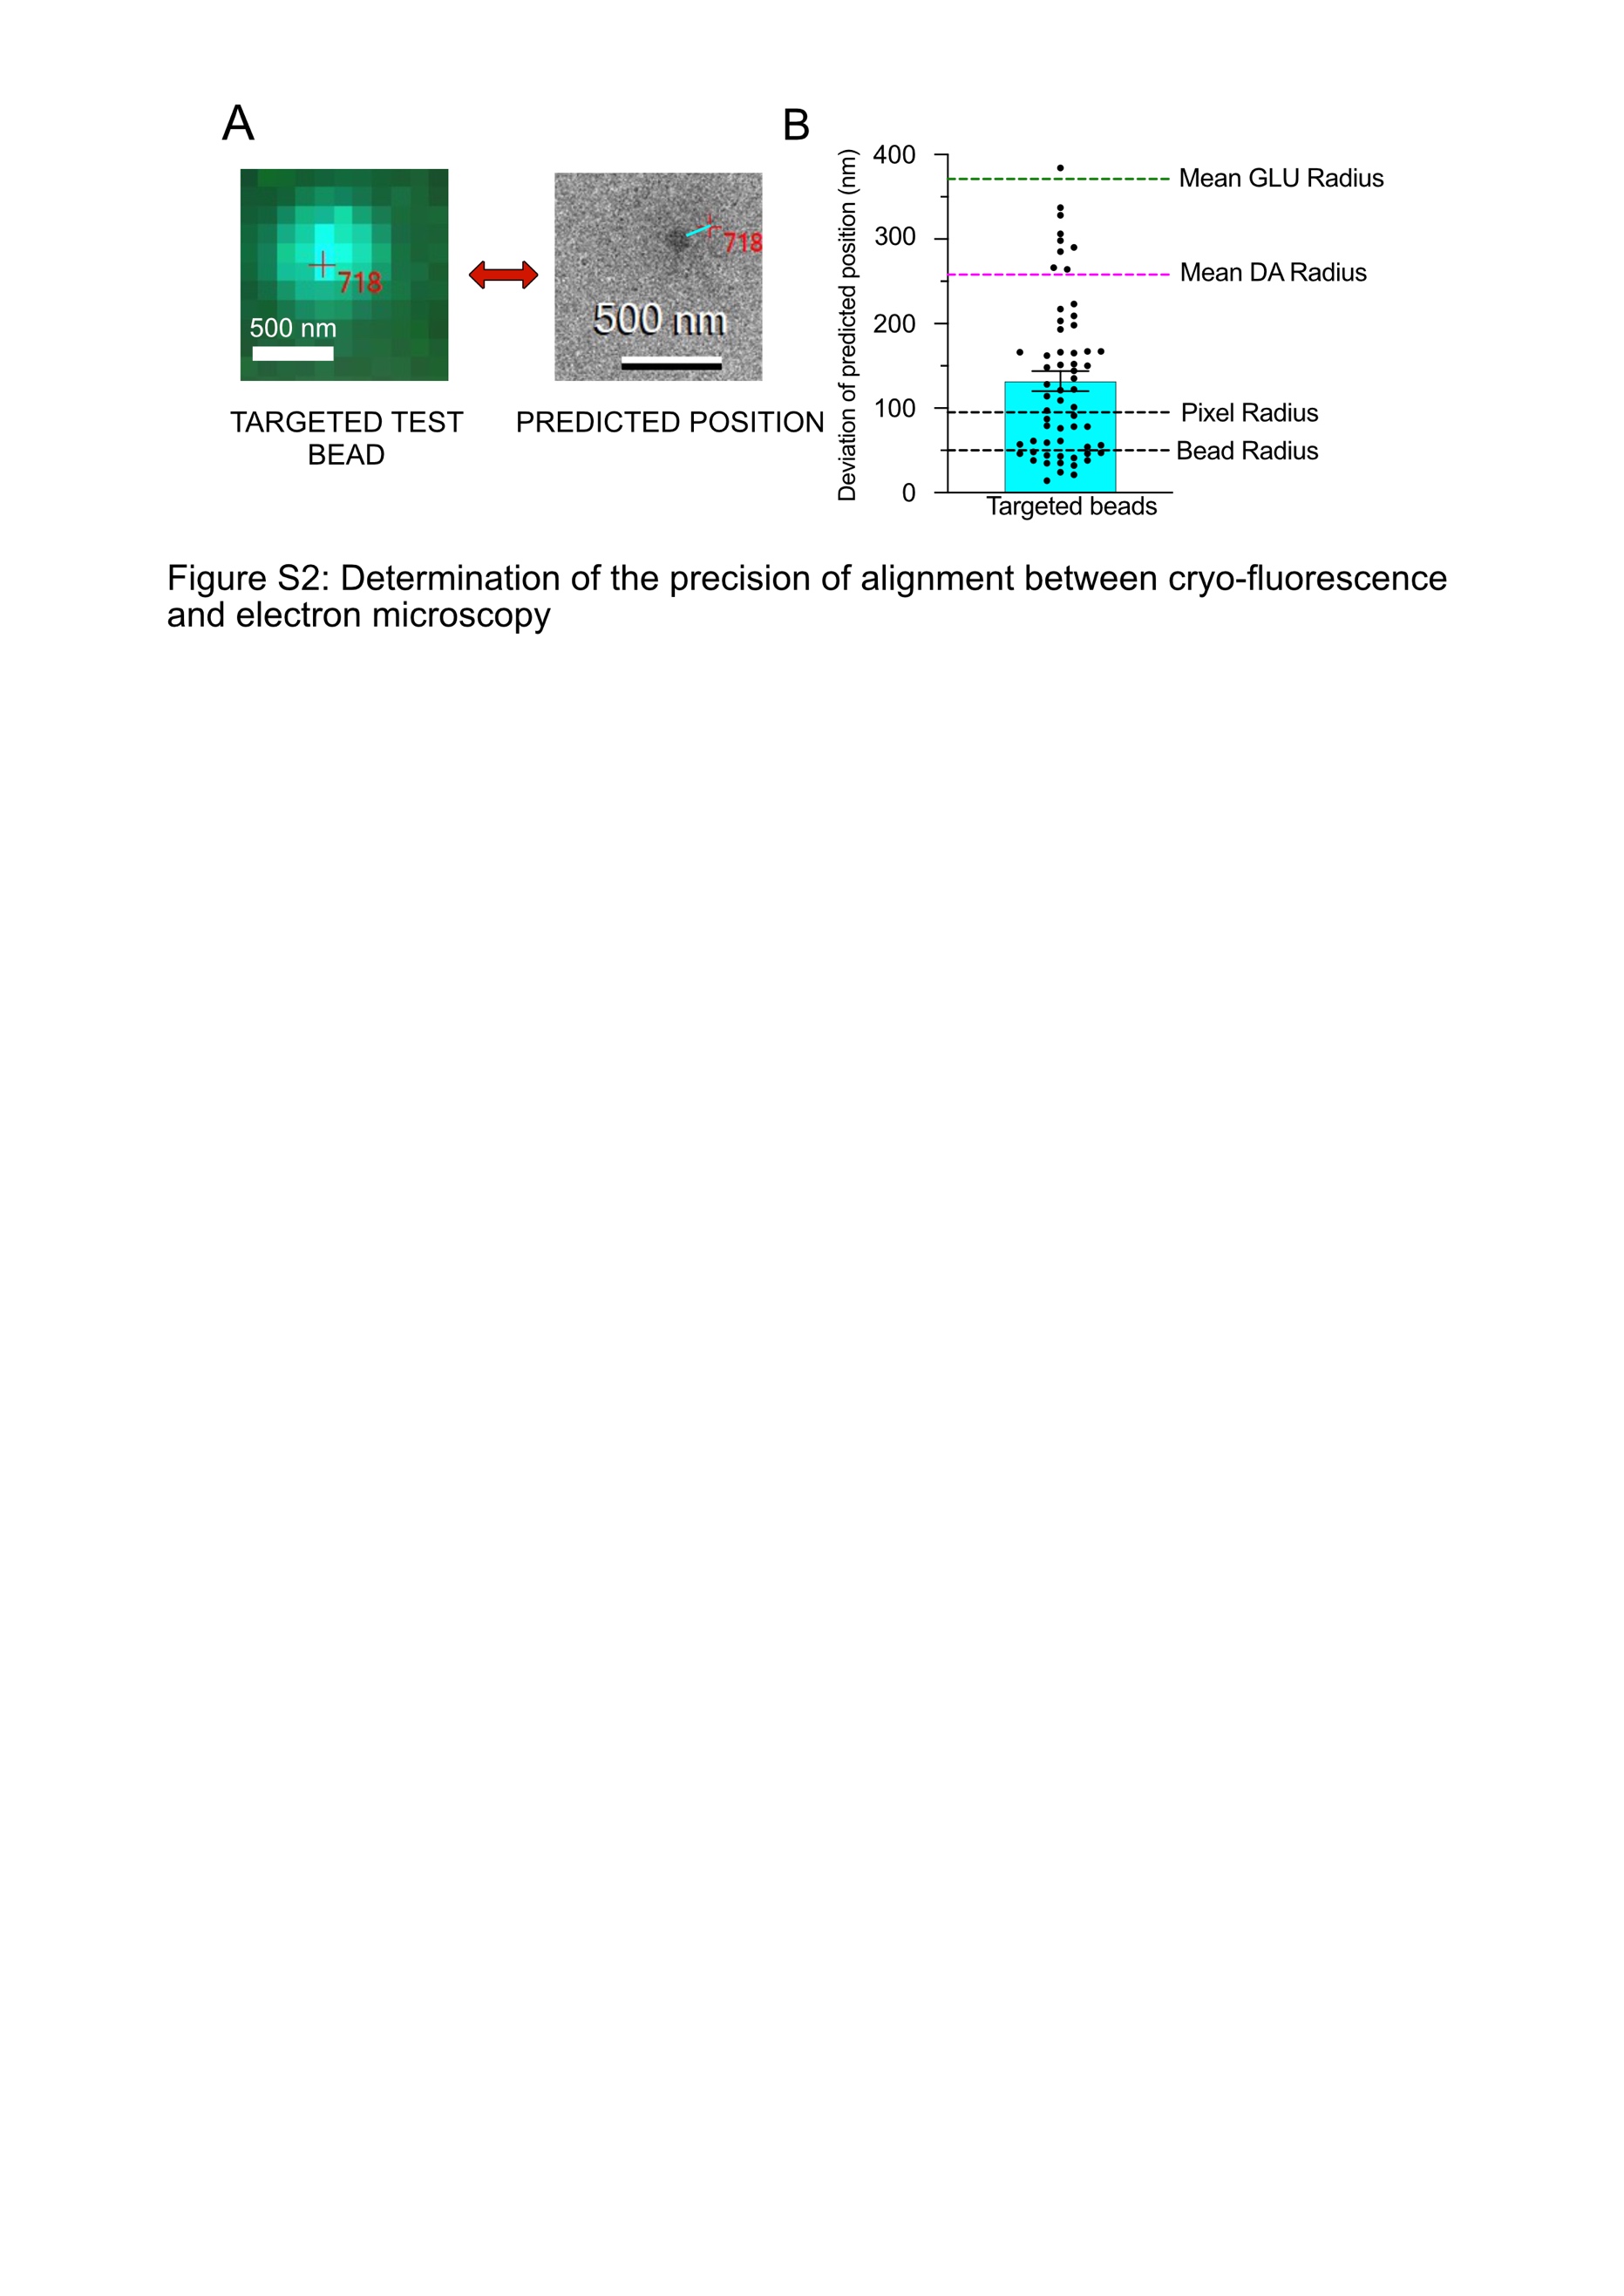
**Figure S2: Pointing precision of the alignment between fluorescence and electron microscopy A**, Representative images of a fluorescent fiducial bead that has not served for the correlation, in cryo-fluorescence microscopy (left) and in cryo-EM (right). The red cross (718) indicates the targeted position on the fluorescent image and the predicted position obtained on the cryo-EM after transformation. The cyan line shows the distance between the predicted position and the actual bead **B**, Histogram showing the deviation of the predicted positions in nanometers for beads that have not been used for the transformation. The average distance is 116 nm which corresponds to 44% of the mean DA radius and 31% the mean GLU radius (n = 64).

**
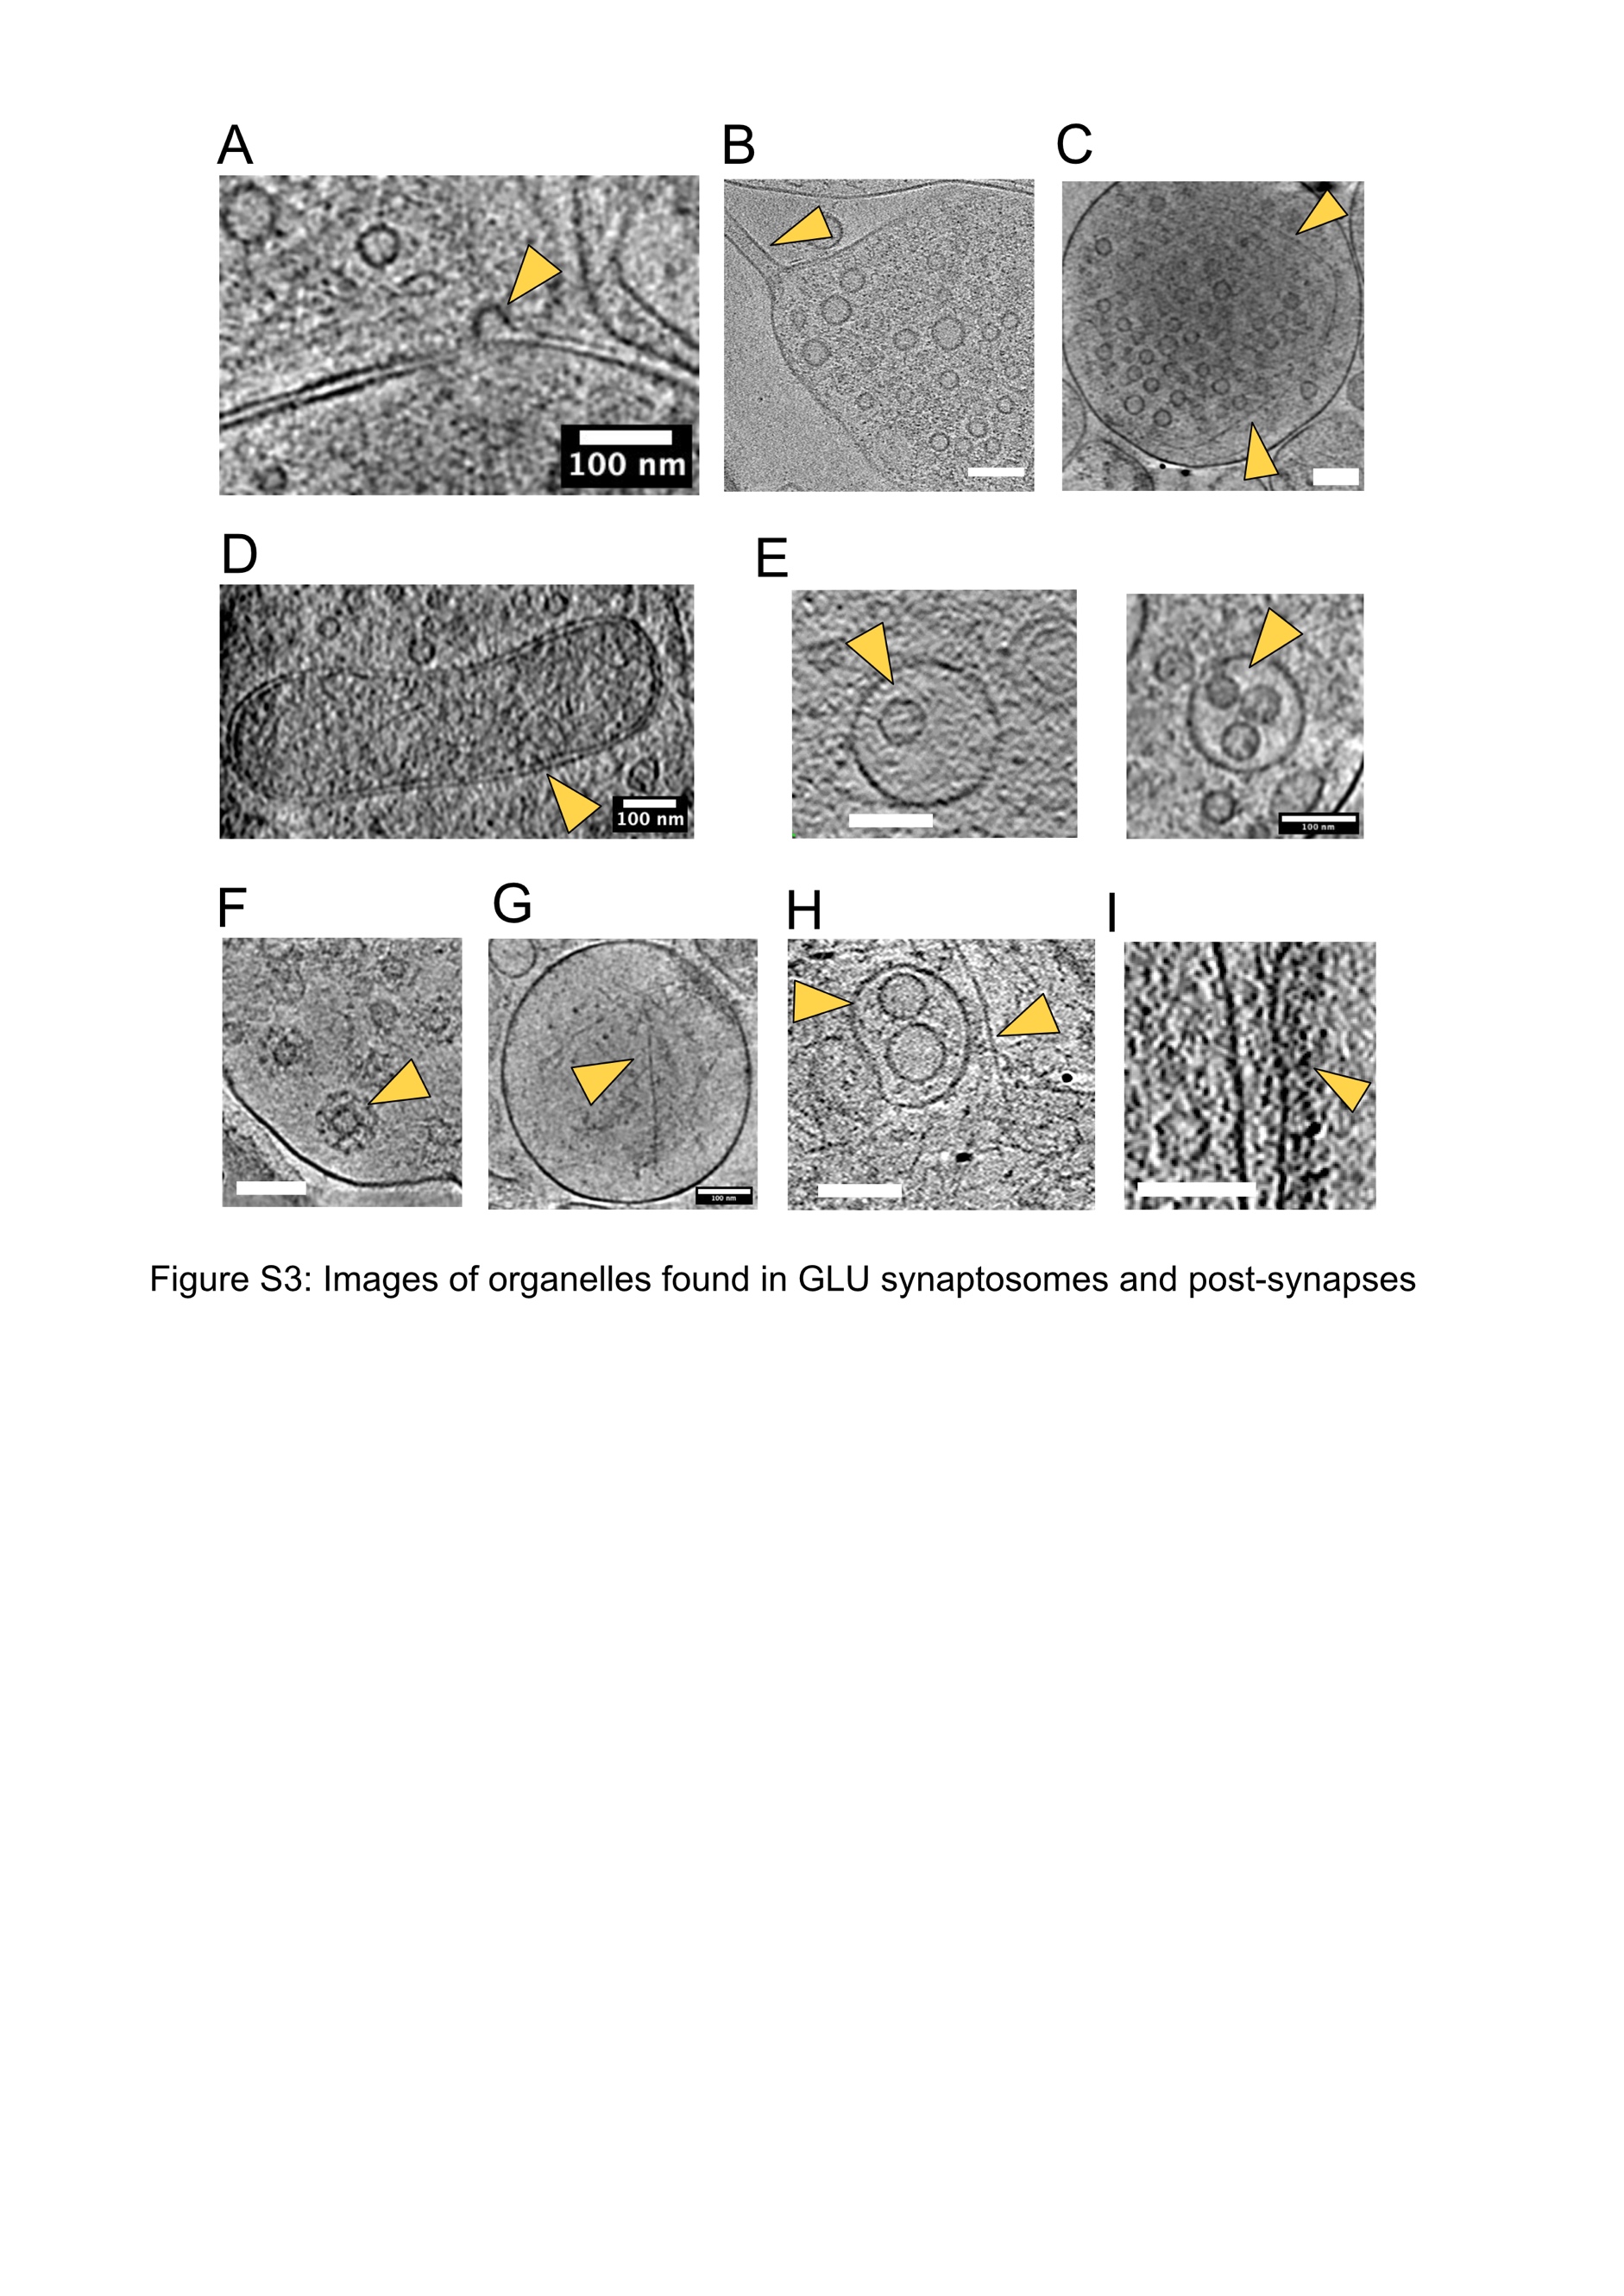
**

**Figure S3: Examples of structures and organelles found in GLU synaptosomes (A-F) and post-synaptic elements (G-I).** Orange arrows point to the organelles of interest in all panels.  **A**, Example of a membrane invagination, either an exocytic or endocytic event. **B**, Example of a narrow membrane tubule on one side of the GLU synaptosome. Perhaps a remaining axonal part filled with microtubules. **C**, Example of filaments surrounding synaptic vesicles. **D**, Example of a mitochondrion. **E**, Examples of multivesicular bodies. **F**, Example of clathrin-coated vesicles. **G**, Example of actin filaments in the PSE. **H**, Examples of a multivesicular body and a dense actin filaments network. **I**, Example of a post-synaptic density. Scale bars 100 nm.


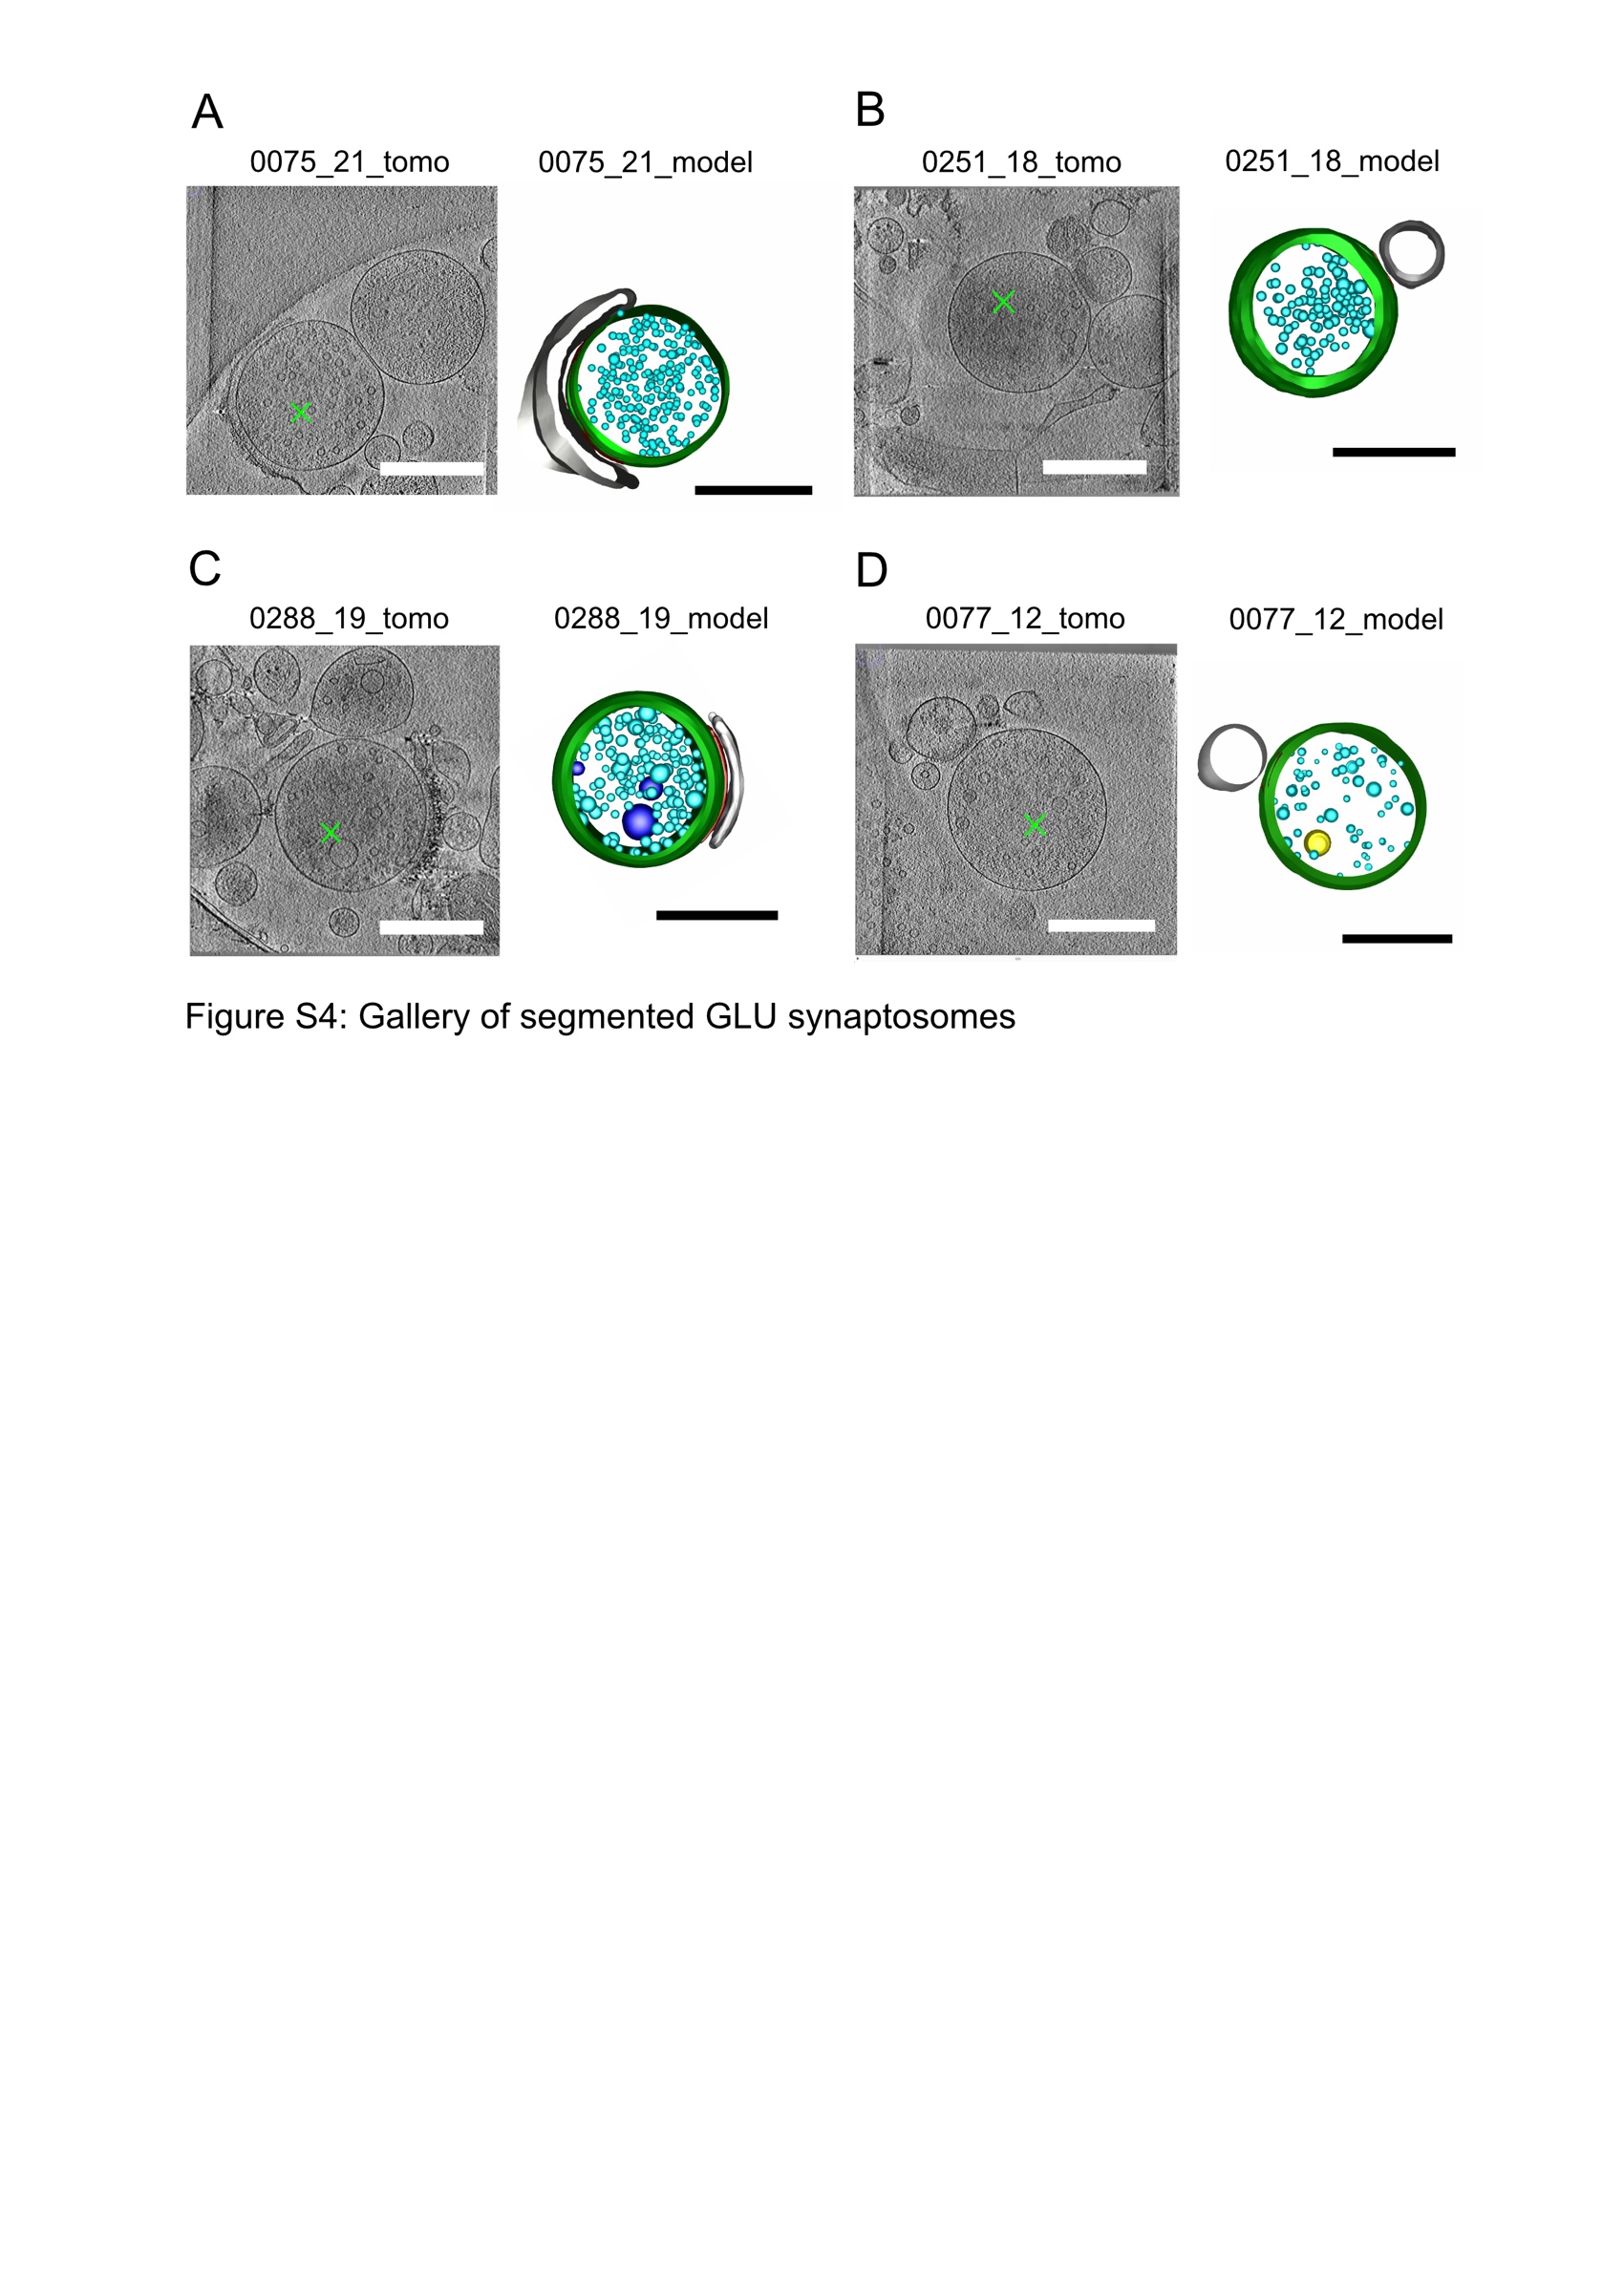


**Figure S4: Gallery of segmented GLU synaptosomes. A,** Example of a tomogram (numbered 0075_21) showing a GLU synaptosome (green cross, left) and the corresponding 3D model (right). The plasma membrane is represented in green, the post-synaptic element in light grey and synaptic vesicles in cyan **B,** Similar example for the tomogram numbered 0251_18. **C**, Similar example for tomogram 0288_19. Multivesicular bodies are drawn in dark blue. **D,** Similar example for tomogram 0077_12. Large vesicle is shown in yellow. Scale bar: 500 nm.

For the 3D models, the color coding is the same as in Figure 2 and 3.


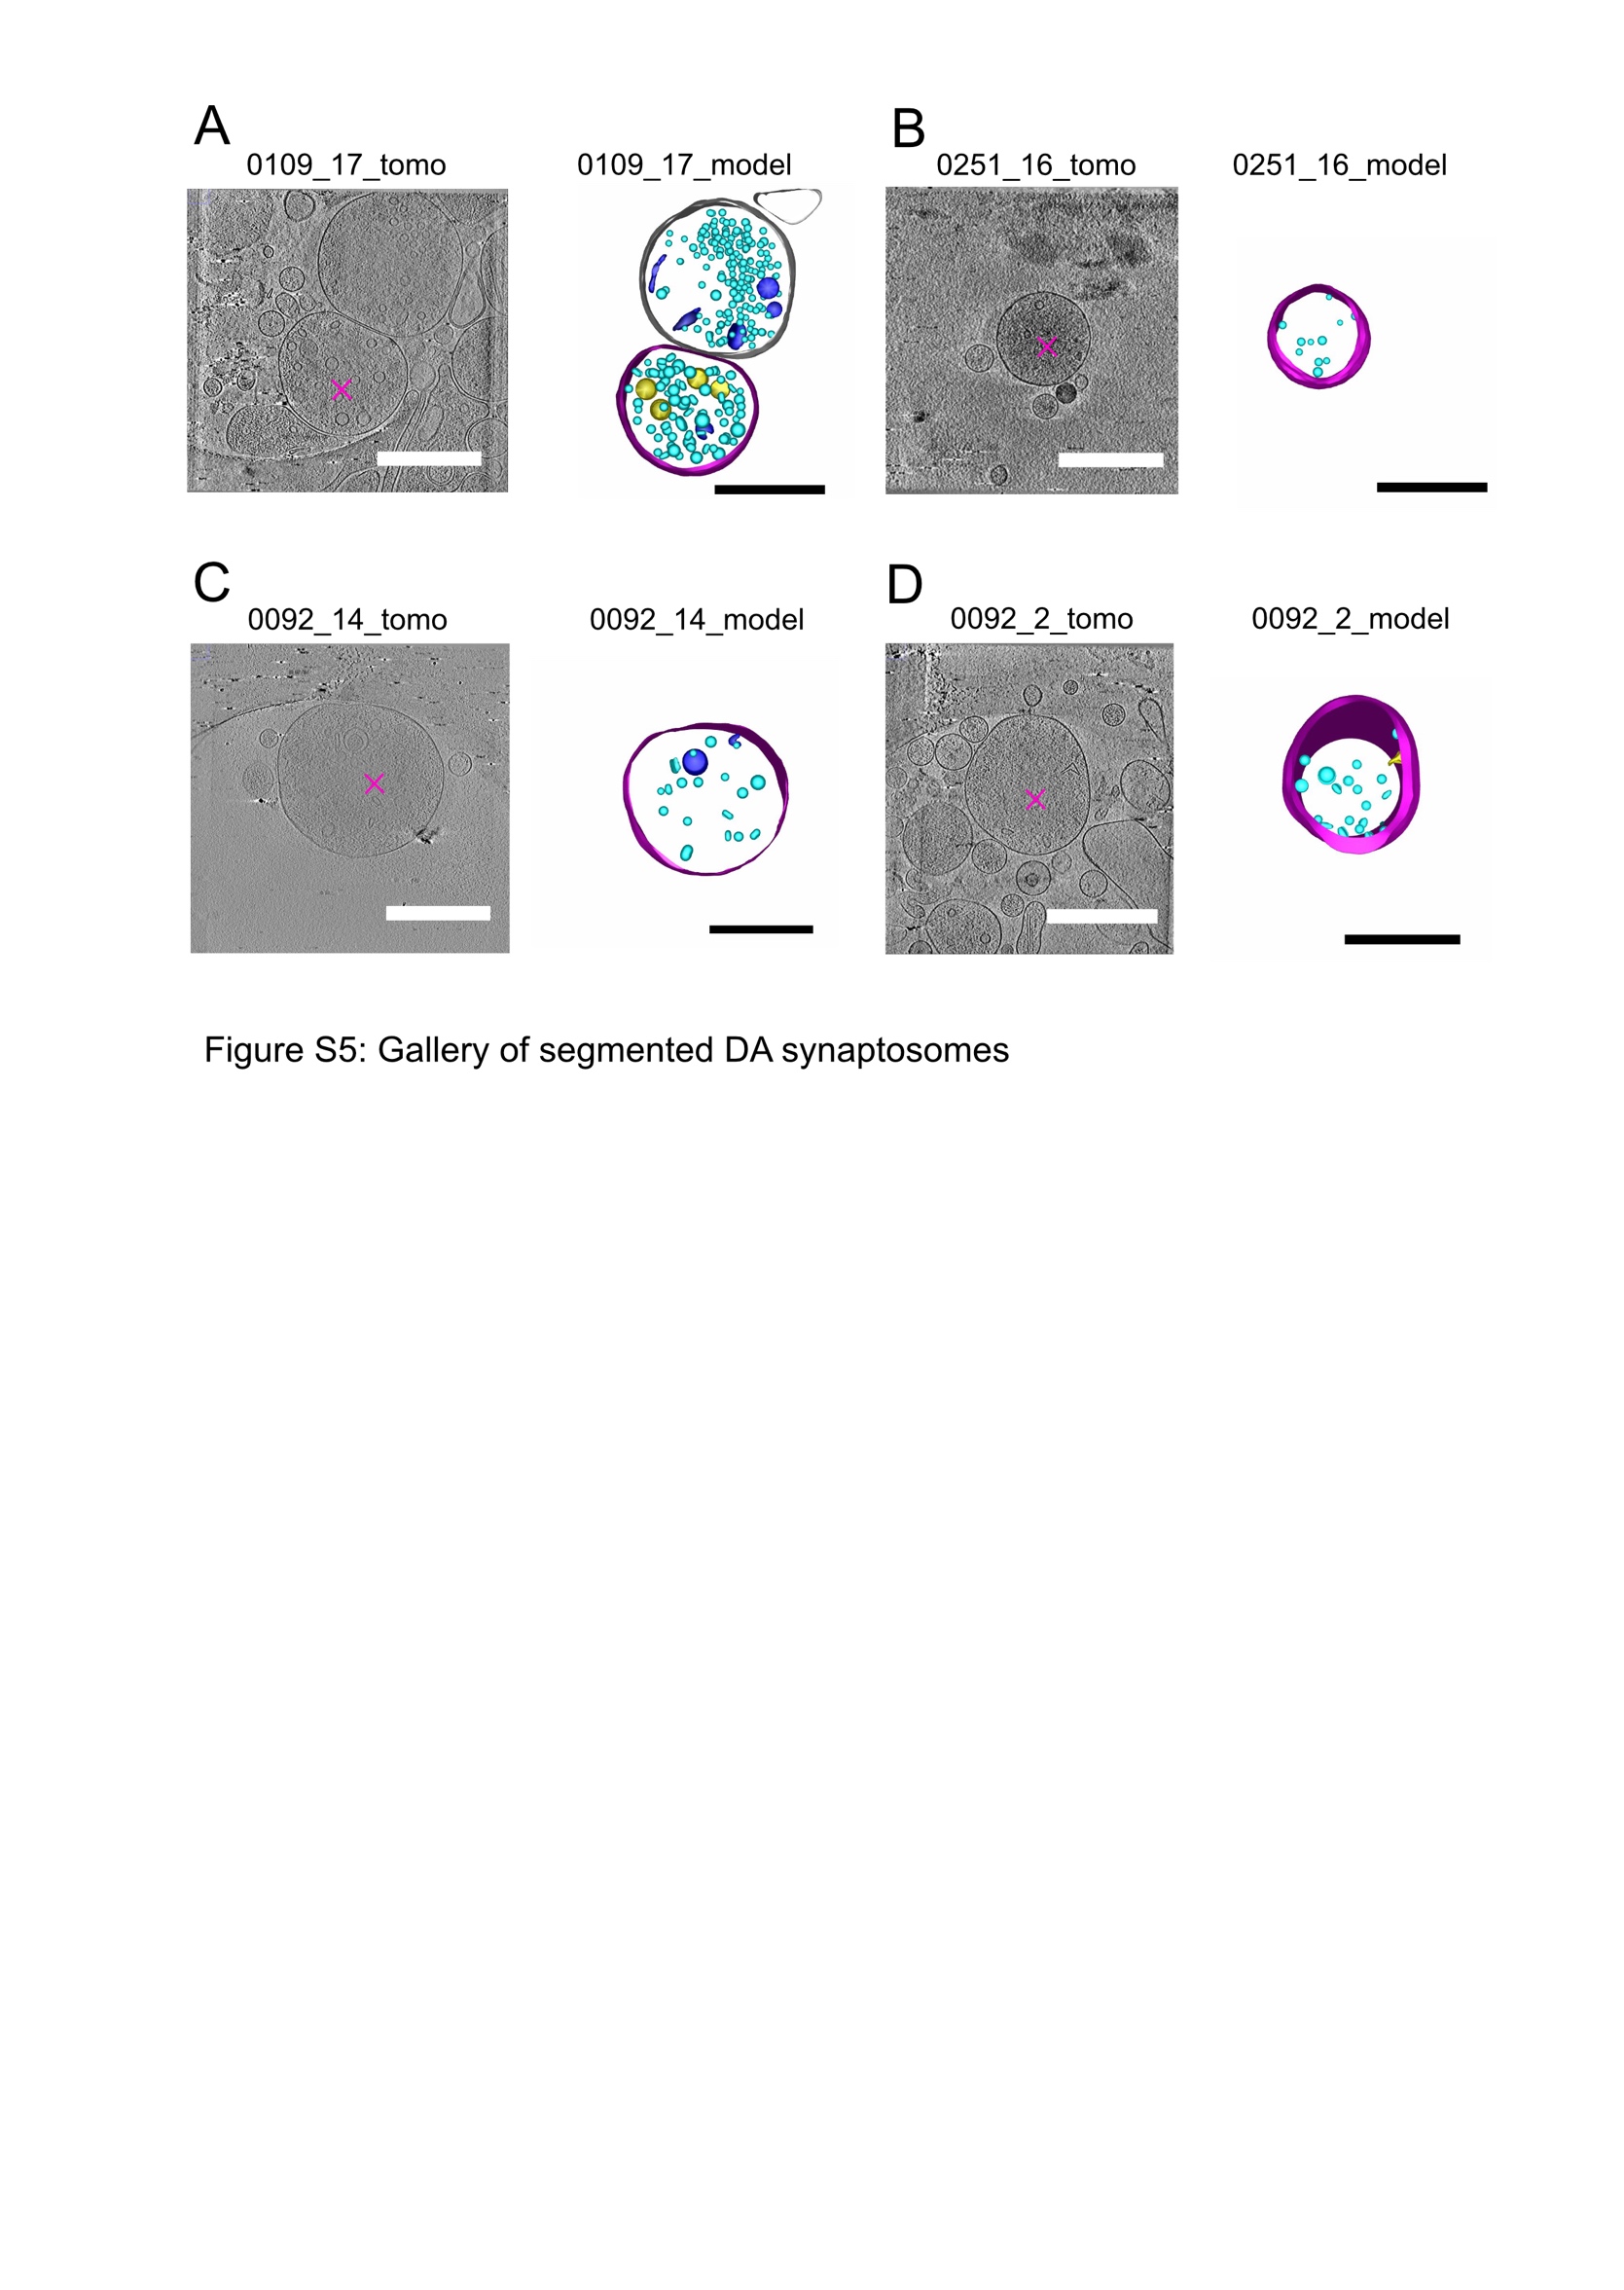


**Figure S5: Gallery of segmented DA synaptosomes. A,** Example of a tomogram (numbered 0109_17) showing a DA synaptosome (magenta star, left) and the corresponding 3D model (right). The DA element adheres to another element resembling a GLU synapse with many SVs and a clear PSE (top right). However, this tomogram was obtained in a mouse in which only DA neurons are fluorescent (DAT-Cre injected with AAV-Flex-NeonGreen), so the identity of the adhering structure could not be confirmed with fluorescence. **B,** Similar example for tomogram 0251_16 **C**, Similar example for 0092_14 **D,** Similar example for 0092_2. Scale bars: 500 nm. For the 3D models, the color coding is the same as in Figure 2 and 3.


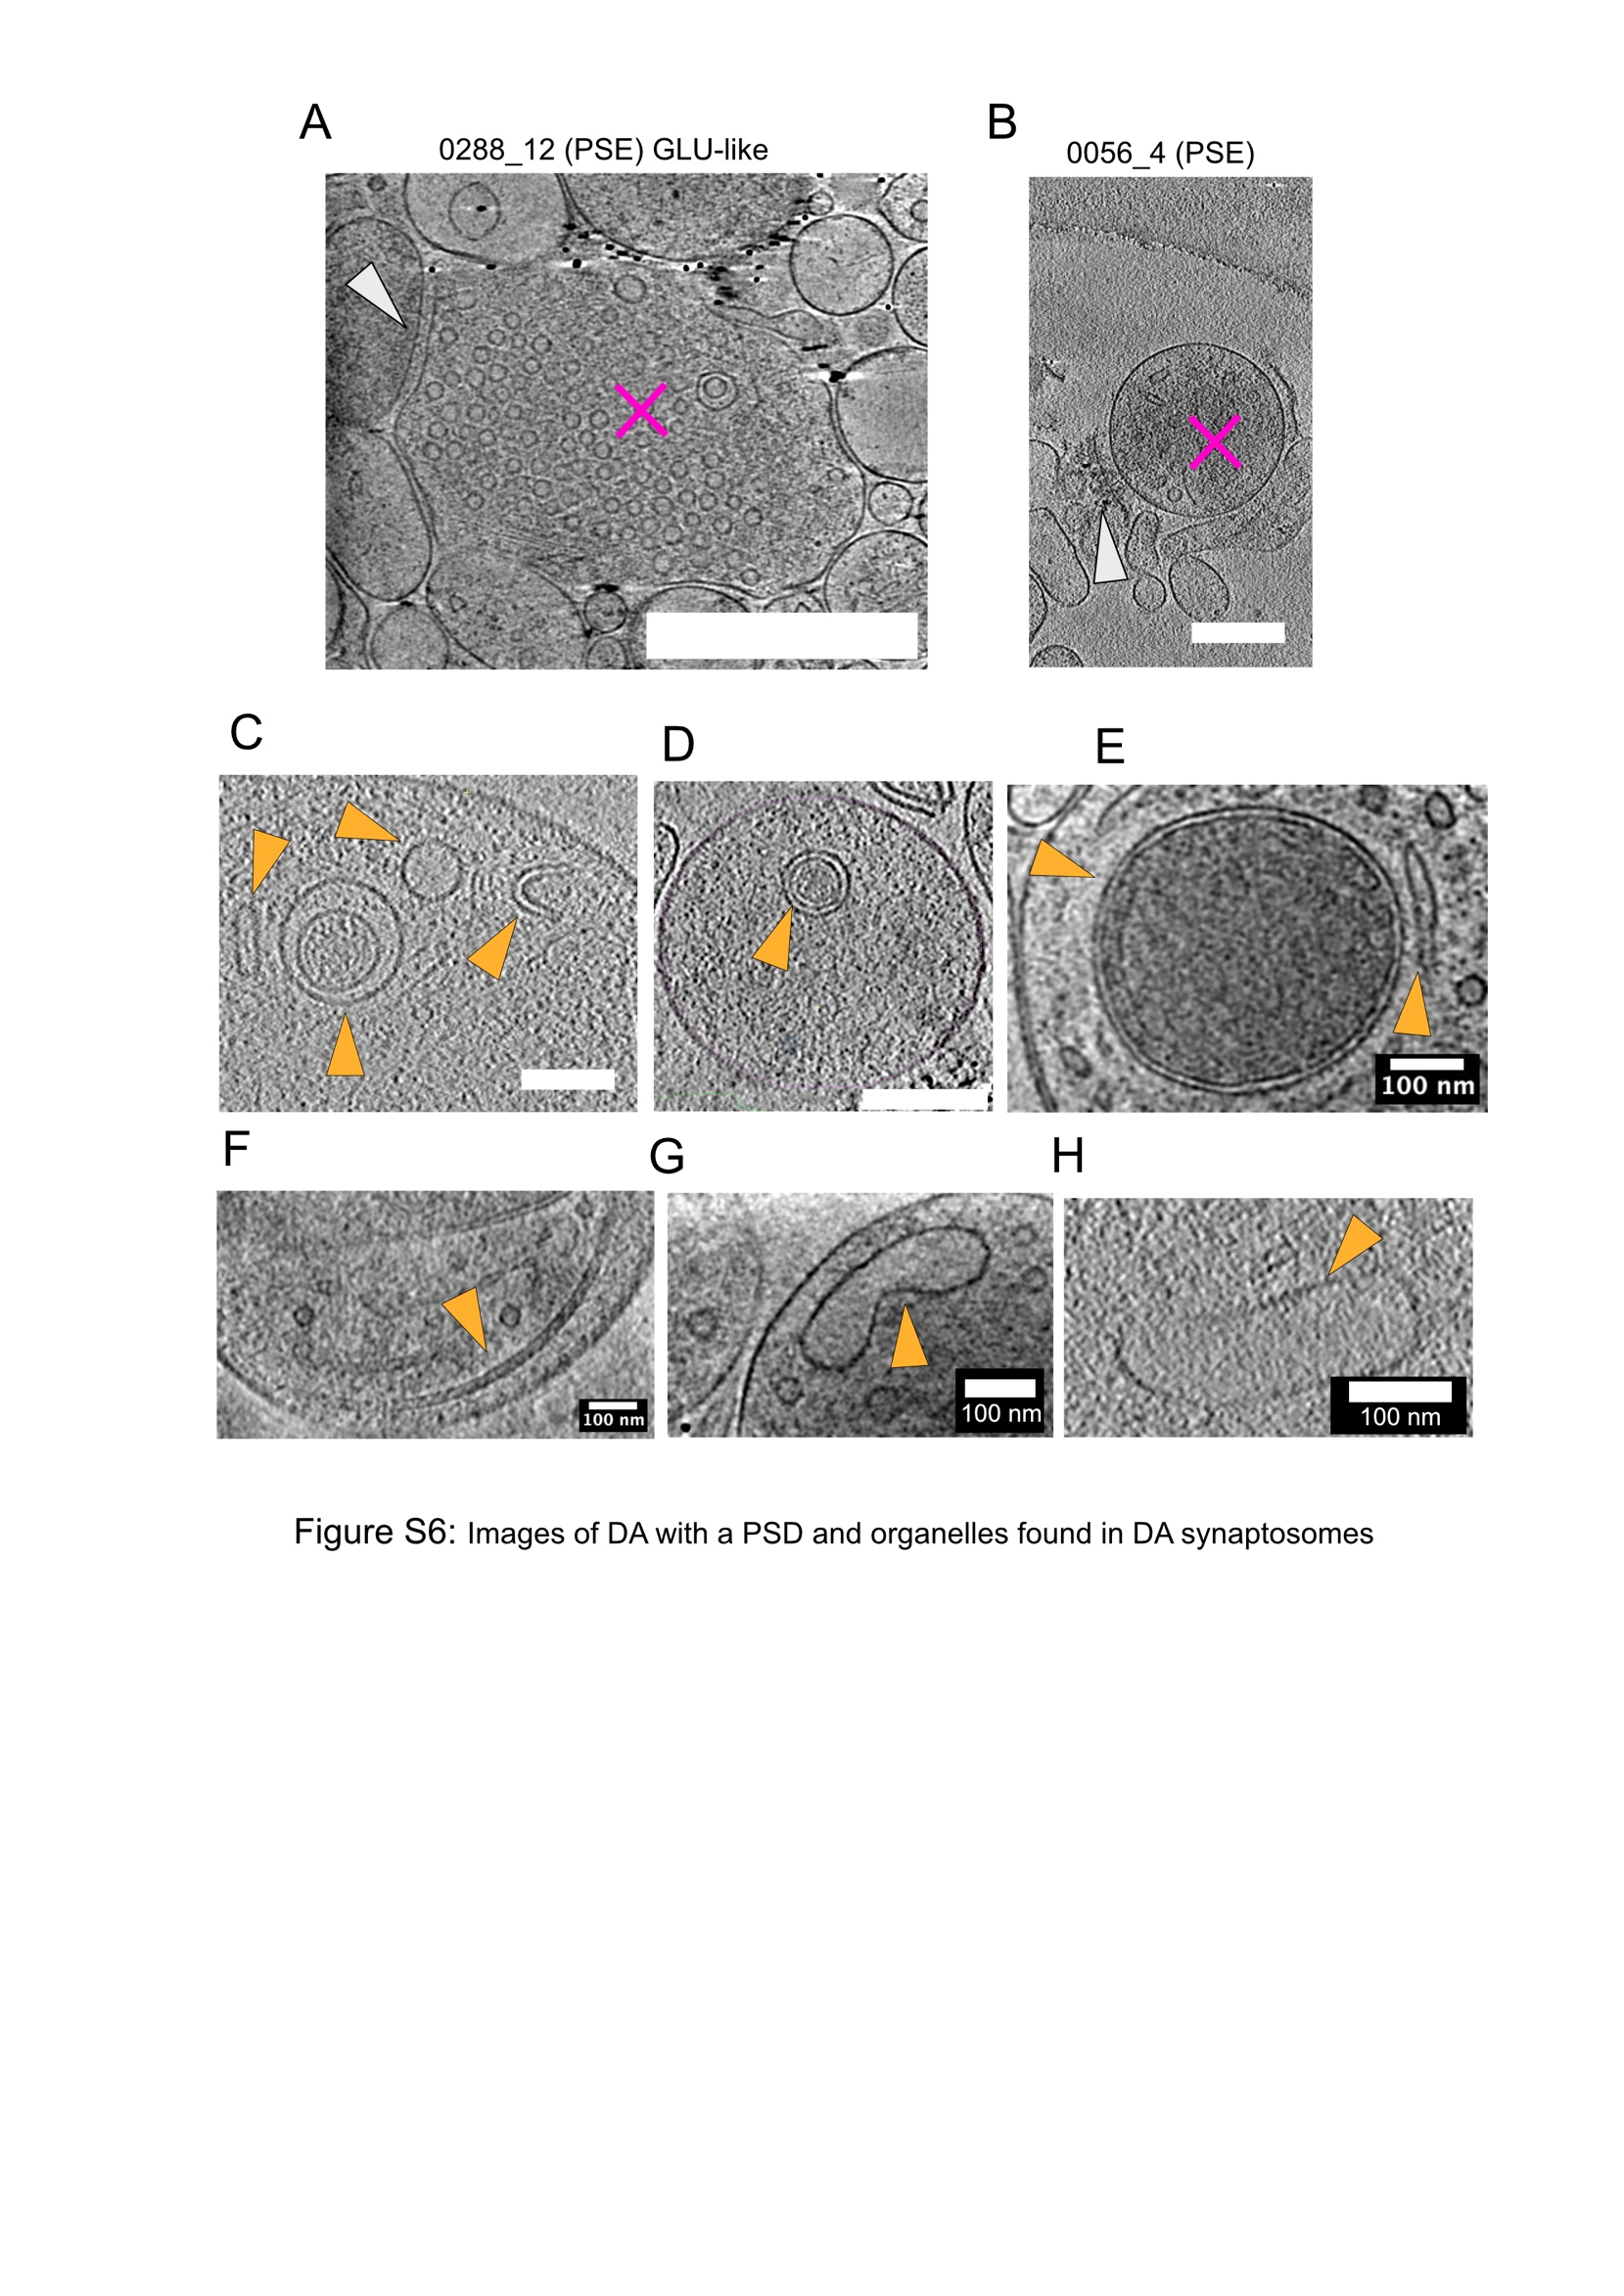


**Figure S6: Images of DA with a PSD and organelles found in DA synaptosomes. A**, DA synaptosome (magenta star) resembling a GLU synaptosome facing a PSE containing a PSD (grey arrow). It has 610 small synaptic vesicles, the highest observed in DA synaptosomes. Scale Bar: 500 nm. **B**, DA synaptosome (magenta star) facing an opened PSE with a PSD (grey arrow). Scale bar: 200 nm. **C**, Cytoplasmic content of a DA synaptosome containing, from left to right, a tubular vesicle, a vesicular body, a large vesicle, a C-shaped structure. Scale bar: 200 nm. **D**, A vesicular body. Scale bar: 200 nm. **E**, A mitochondrion (left) and an ER-like structure (right). Scale bar: 100 nm. **F**, A microtubule, Scale bar: 100 nm. **G,H**, Endosome-like structures. Scale bars: 100 nm.


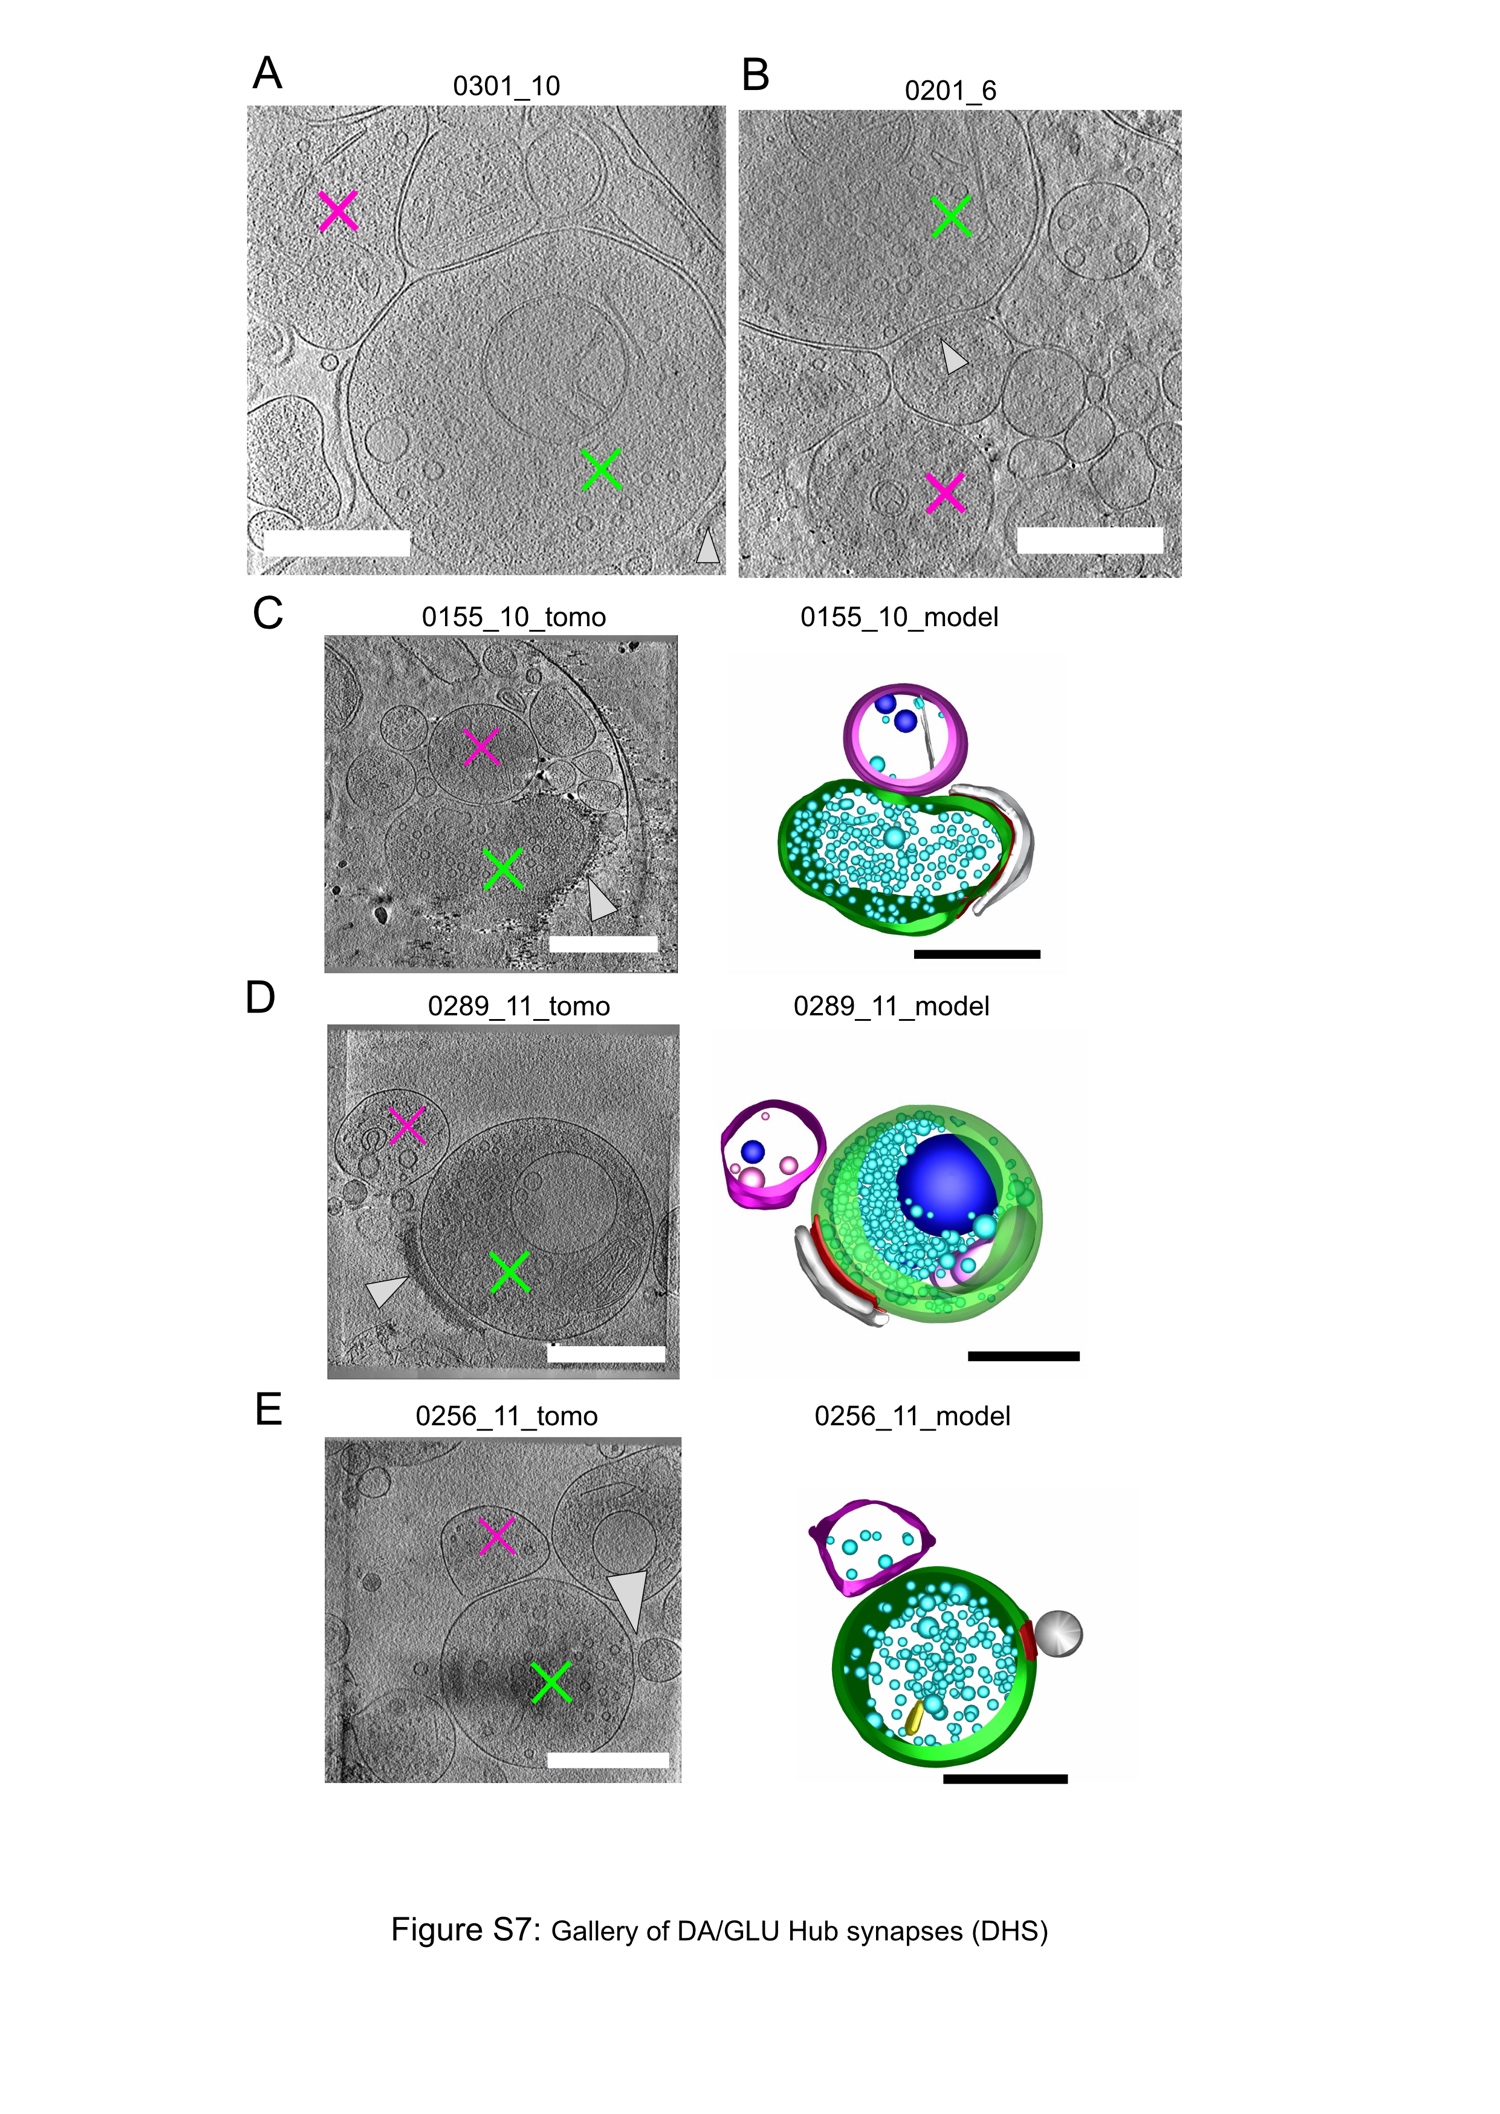


**Figure S7: Gallery of reconstructed CS-DHS identified with both DA and GLU reporters. A**, Single plane of the tomogram 0301_10 showing the DHS corresponding to the model in Figure 3B. DA is shown by the magenta star, GLU by the green cross and the post-synapse by the grey arrow. **B,** Single plane of the tomogram 0201_6 showing the DHS corresponding to the model in figure 3C. **C, D, E**, Examples of tomograms showing DHS (left) with their corresponding 3D model (right). Scale bars: 500 nm.

Color code is similar to fig S4,5.

**
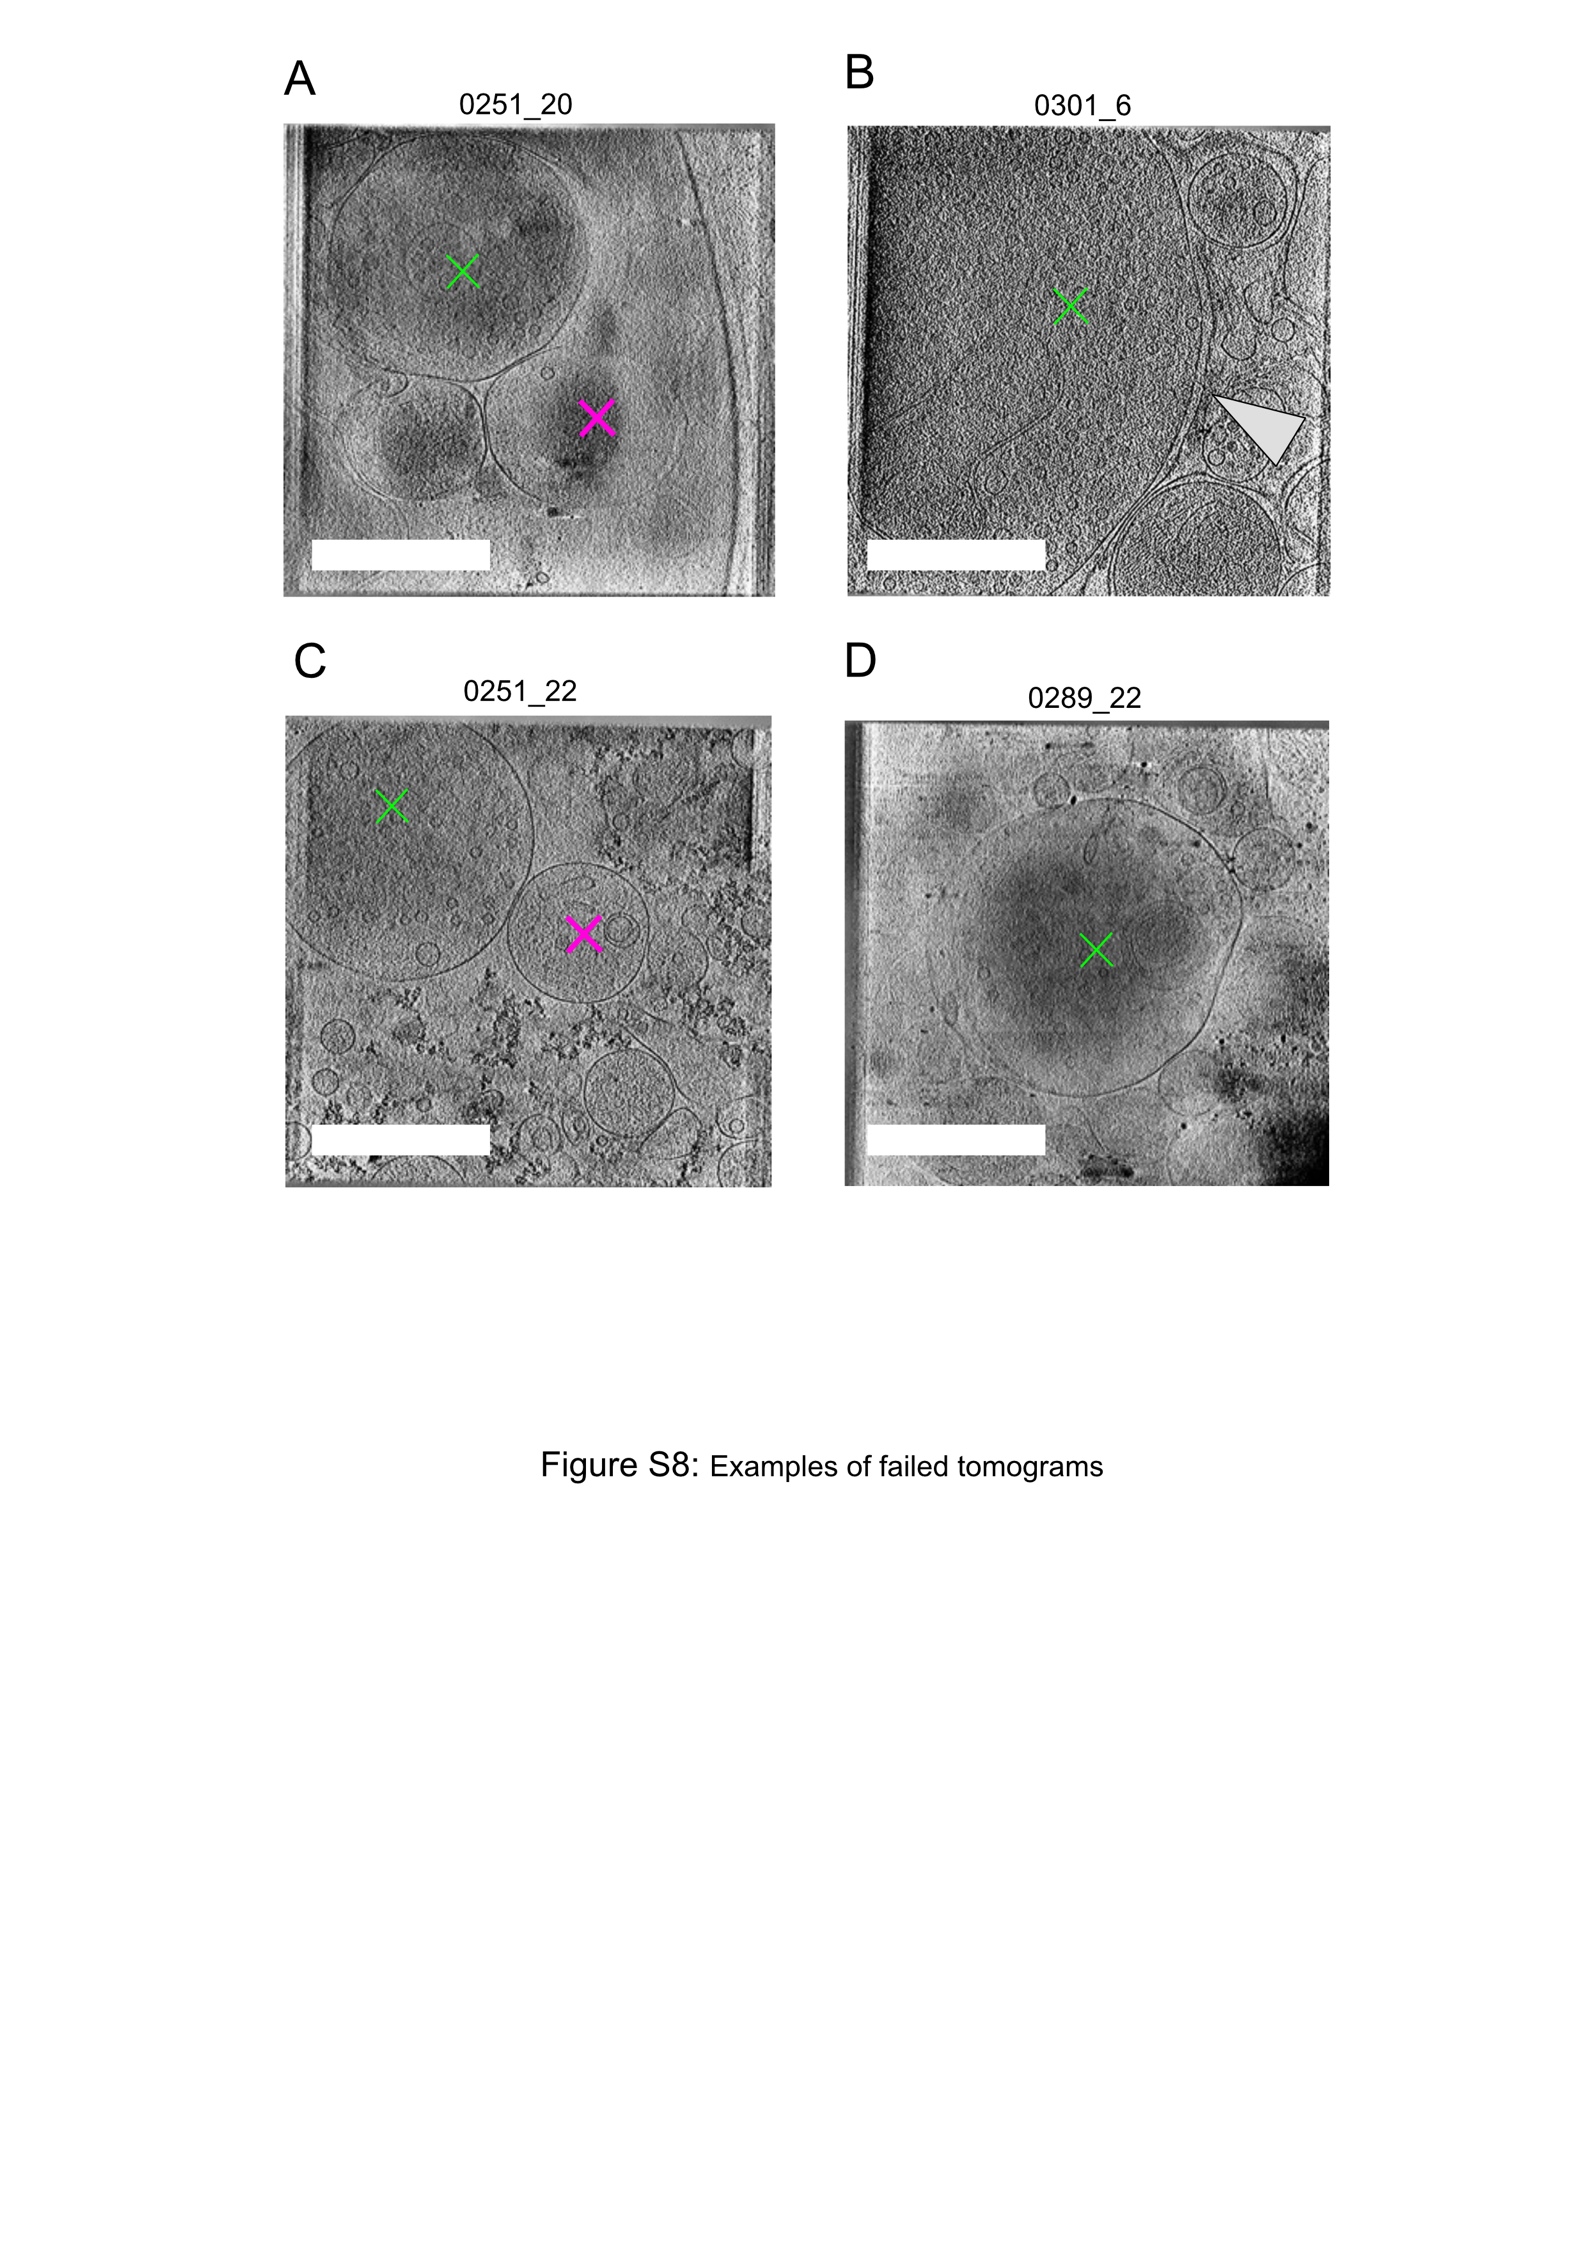
**

**Figure S8: Examples of tomograms not retained for segmentation. A**, Example of a tomogram where reconstruction resulted in a miss-alignment of the planes. **B**, Example of a tomogram plane showing a GLU synaptosome which is too big to obtain a sufficient contrast. **C**, Example of a tomogram where both DA and GLU structures are unrelated according to the correlation. **D**, Example of a tomogram for which the reconstruction failed, it results in very low information across the planes. Scale bars: 500 nm.


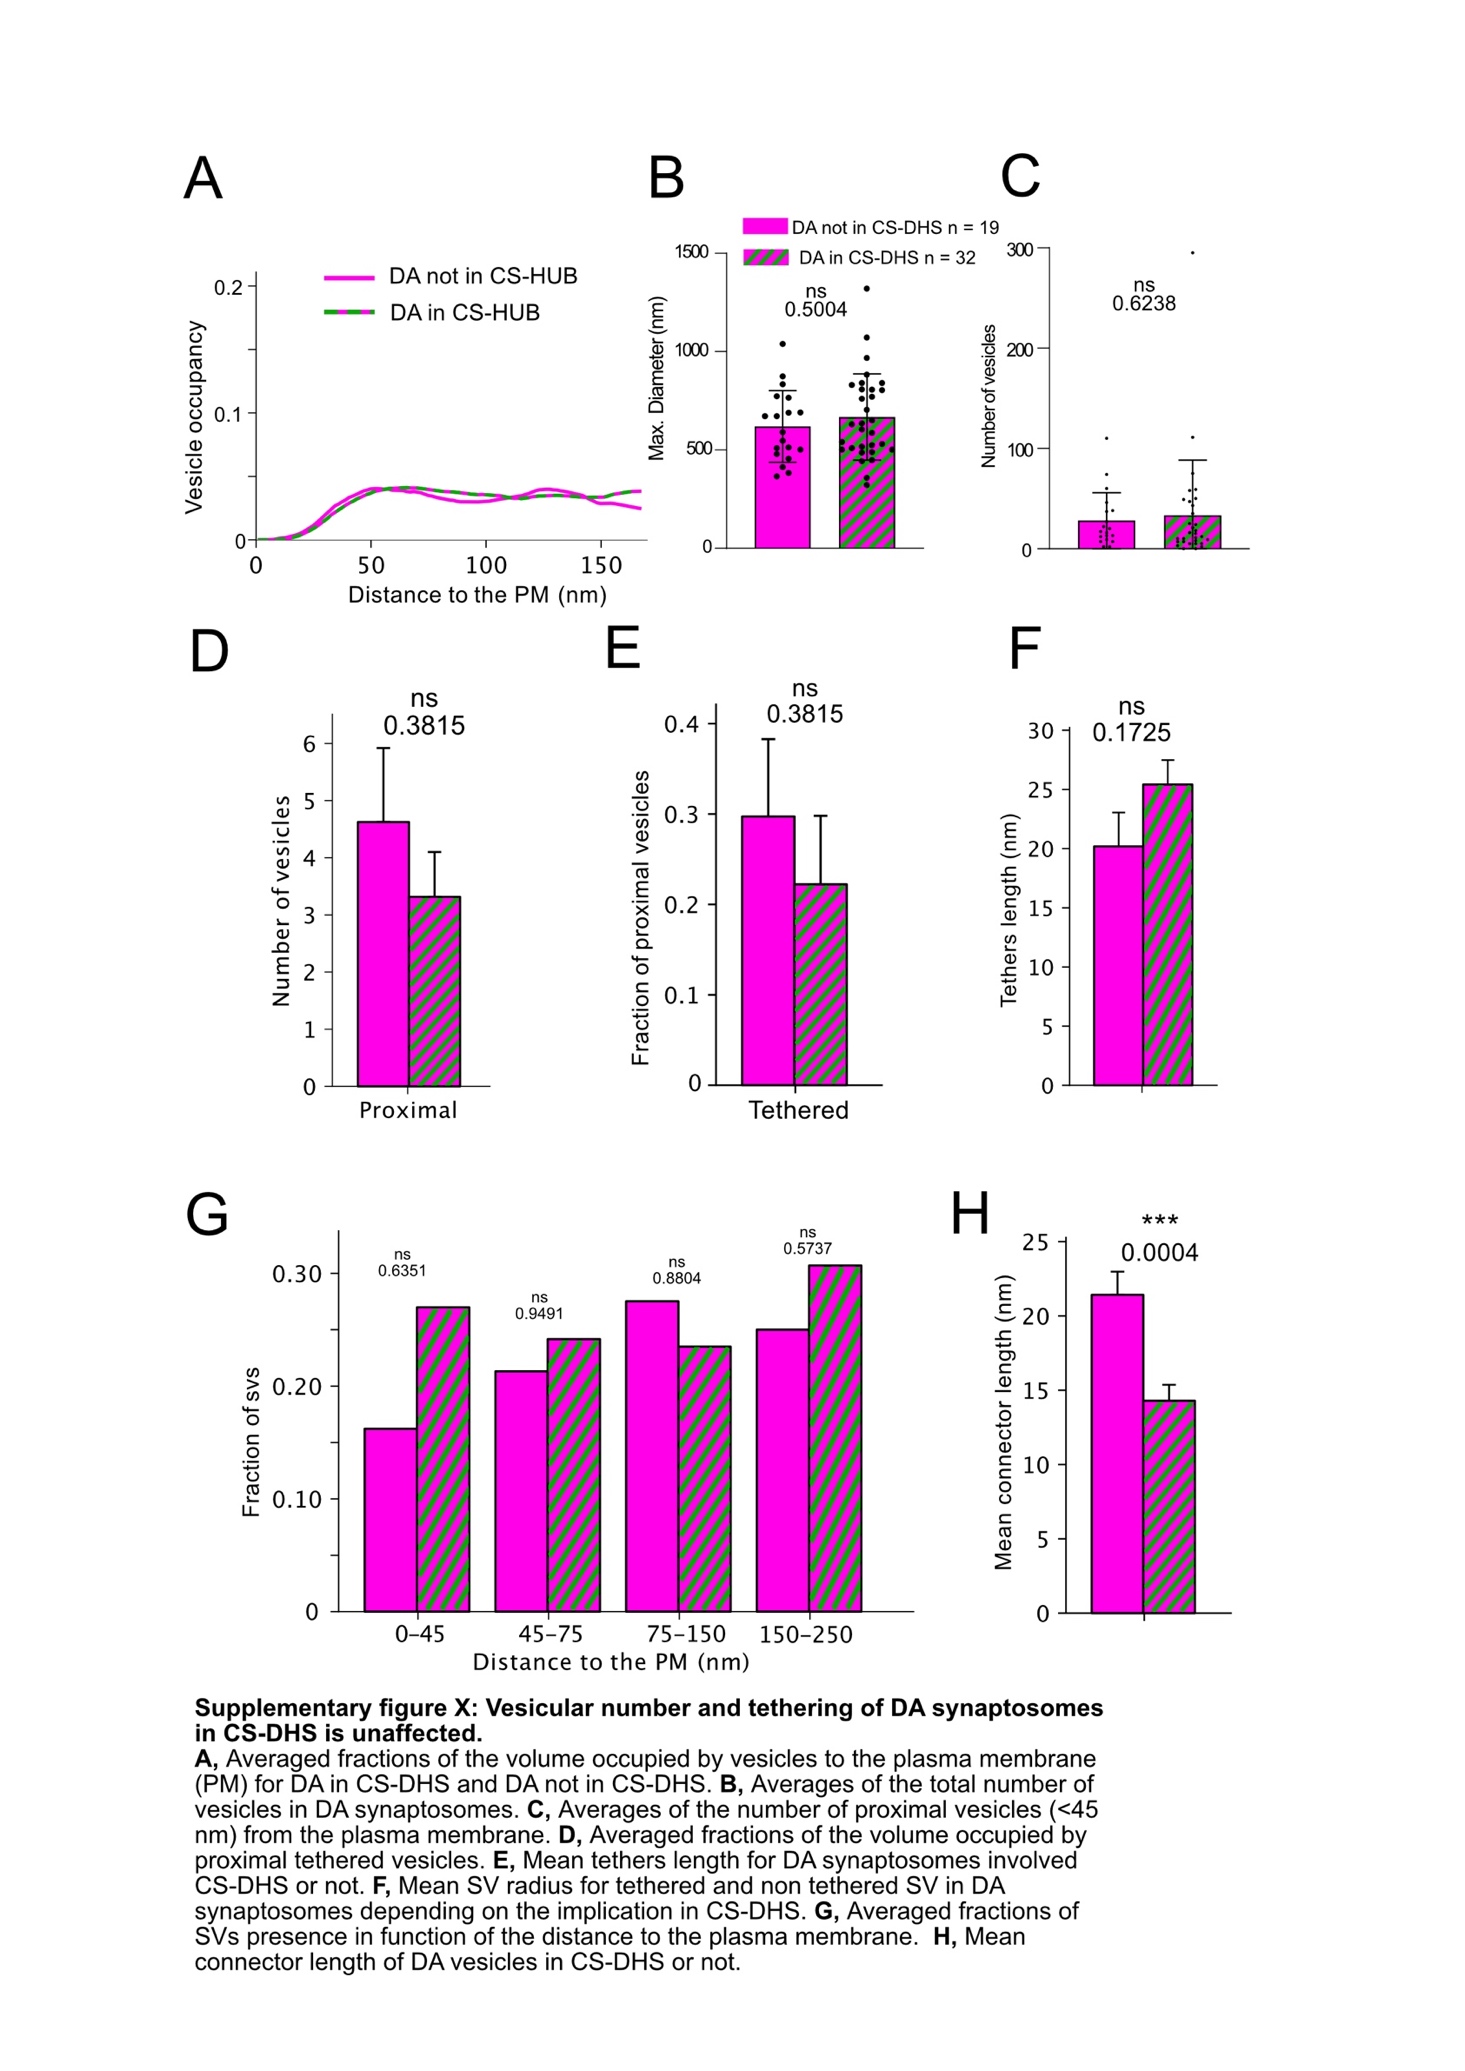


**Supplementary Figure 9: DA synaptosomes organization is unaffected in CS-DHS.** **A,** Averaged fractions of the volume occupied by vesicles to the plasma membrane (PM) for DA forming CS-DHS or not. **B,** Mean maximal diameter of DA synaptosomes involved or not in CS-DHS (Mann-Whitney; p-value = 0.500). **C,** Mean number of vesicles in DA synaptosomes forming CS-DHS or not (Mann-Whitney; p-value 0.624). **D,** Averages of the number of proximal vesicles (<45 nm) from the plasma membrane (Mann-Whitney; p-value = 0.382). **E,** Averaged fractions of the volume occupied by proximal tethered vesicles (t-test; p-value 0.382). **F,** Mean tether length in DA synaptosomes involved in CS-DHS or not (t-test; p-value = 0.173). **G,** Fractions of vesicles in function of the distance to the plasma membrane (t-tests; p-values: 0 to 45 nm = 0.635; 45 to 75 nm = 0.949; 75 to 150 nm = 0.880; 150 to 250 nm = 0.574). **H,** Mean connector length of DA vesicles involved in CS-DHS or not (t-test; p-value = 0.0004).


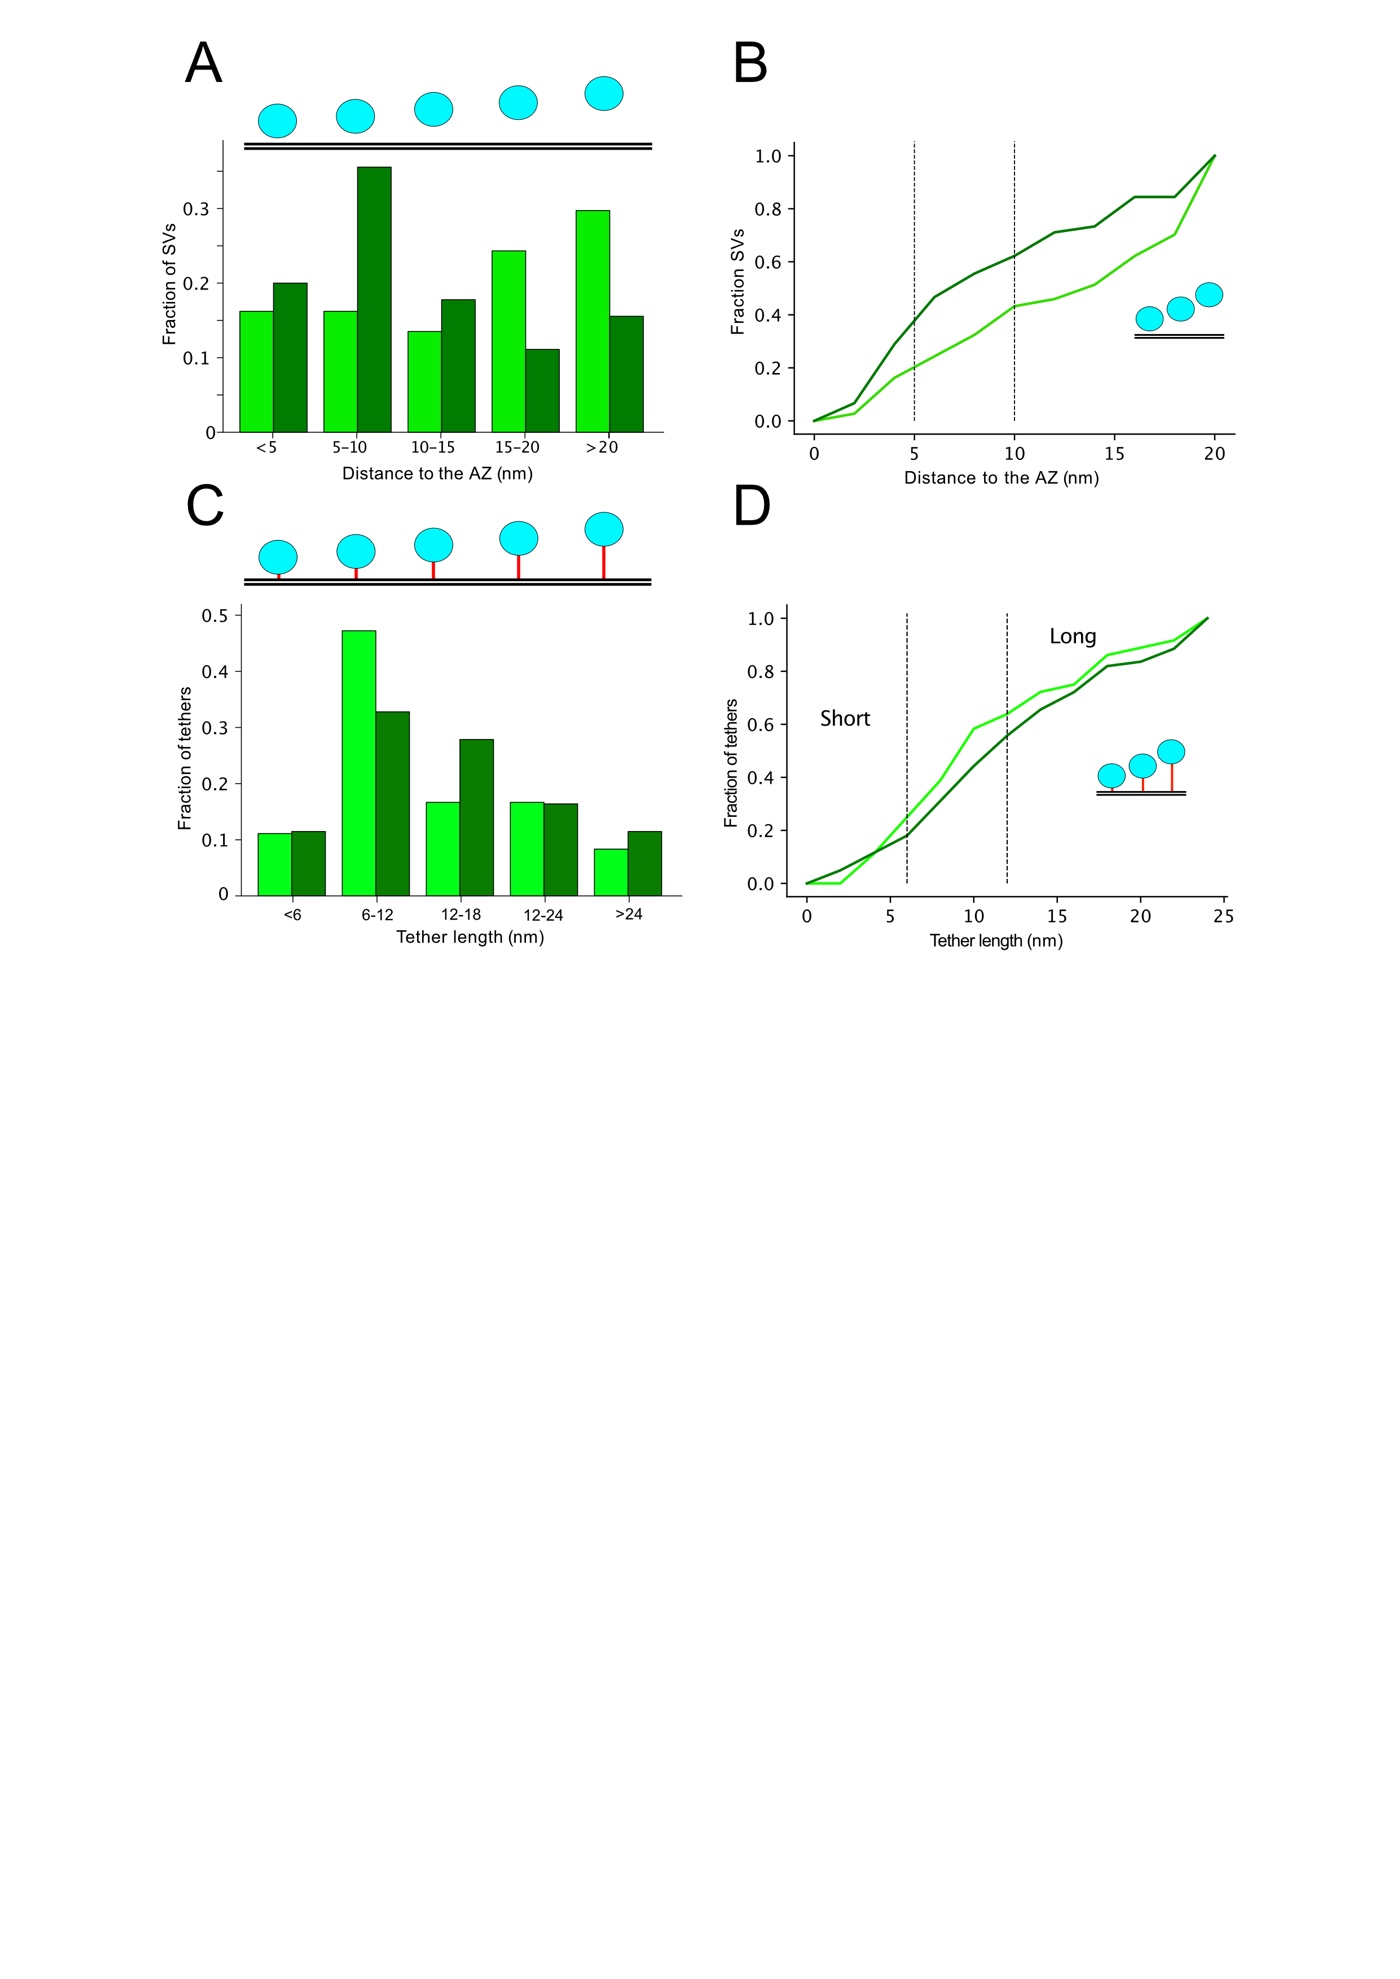


**Supplementary Figure 10: Distribution of proximal GLU vesicles in CS-DHS and tether length.**

**A,** Fractions of proximal vesicles (<45 nm) localized at certain distances from the active zone shown with histograms depending on the involvement in DHS (dark green) or not (light green). **B,** Cumulative distribution of the SV distances from the active zone, data are the same as in (A). **C,** Fractions of tethers corresponding to certain lengths. Tethers from GLU involved in DHS are in dark green, the ones not involved in DHS are in light green. **D,** Cumulative distribution of the length of the tethers. Data are the same as in (C).


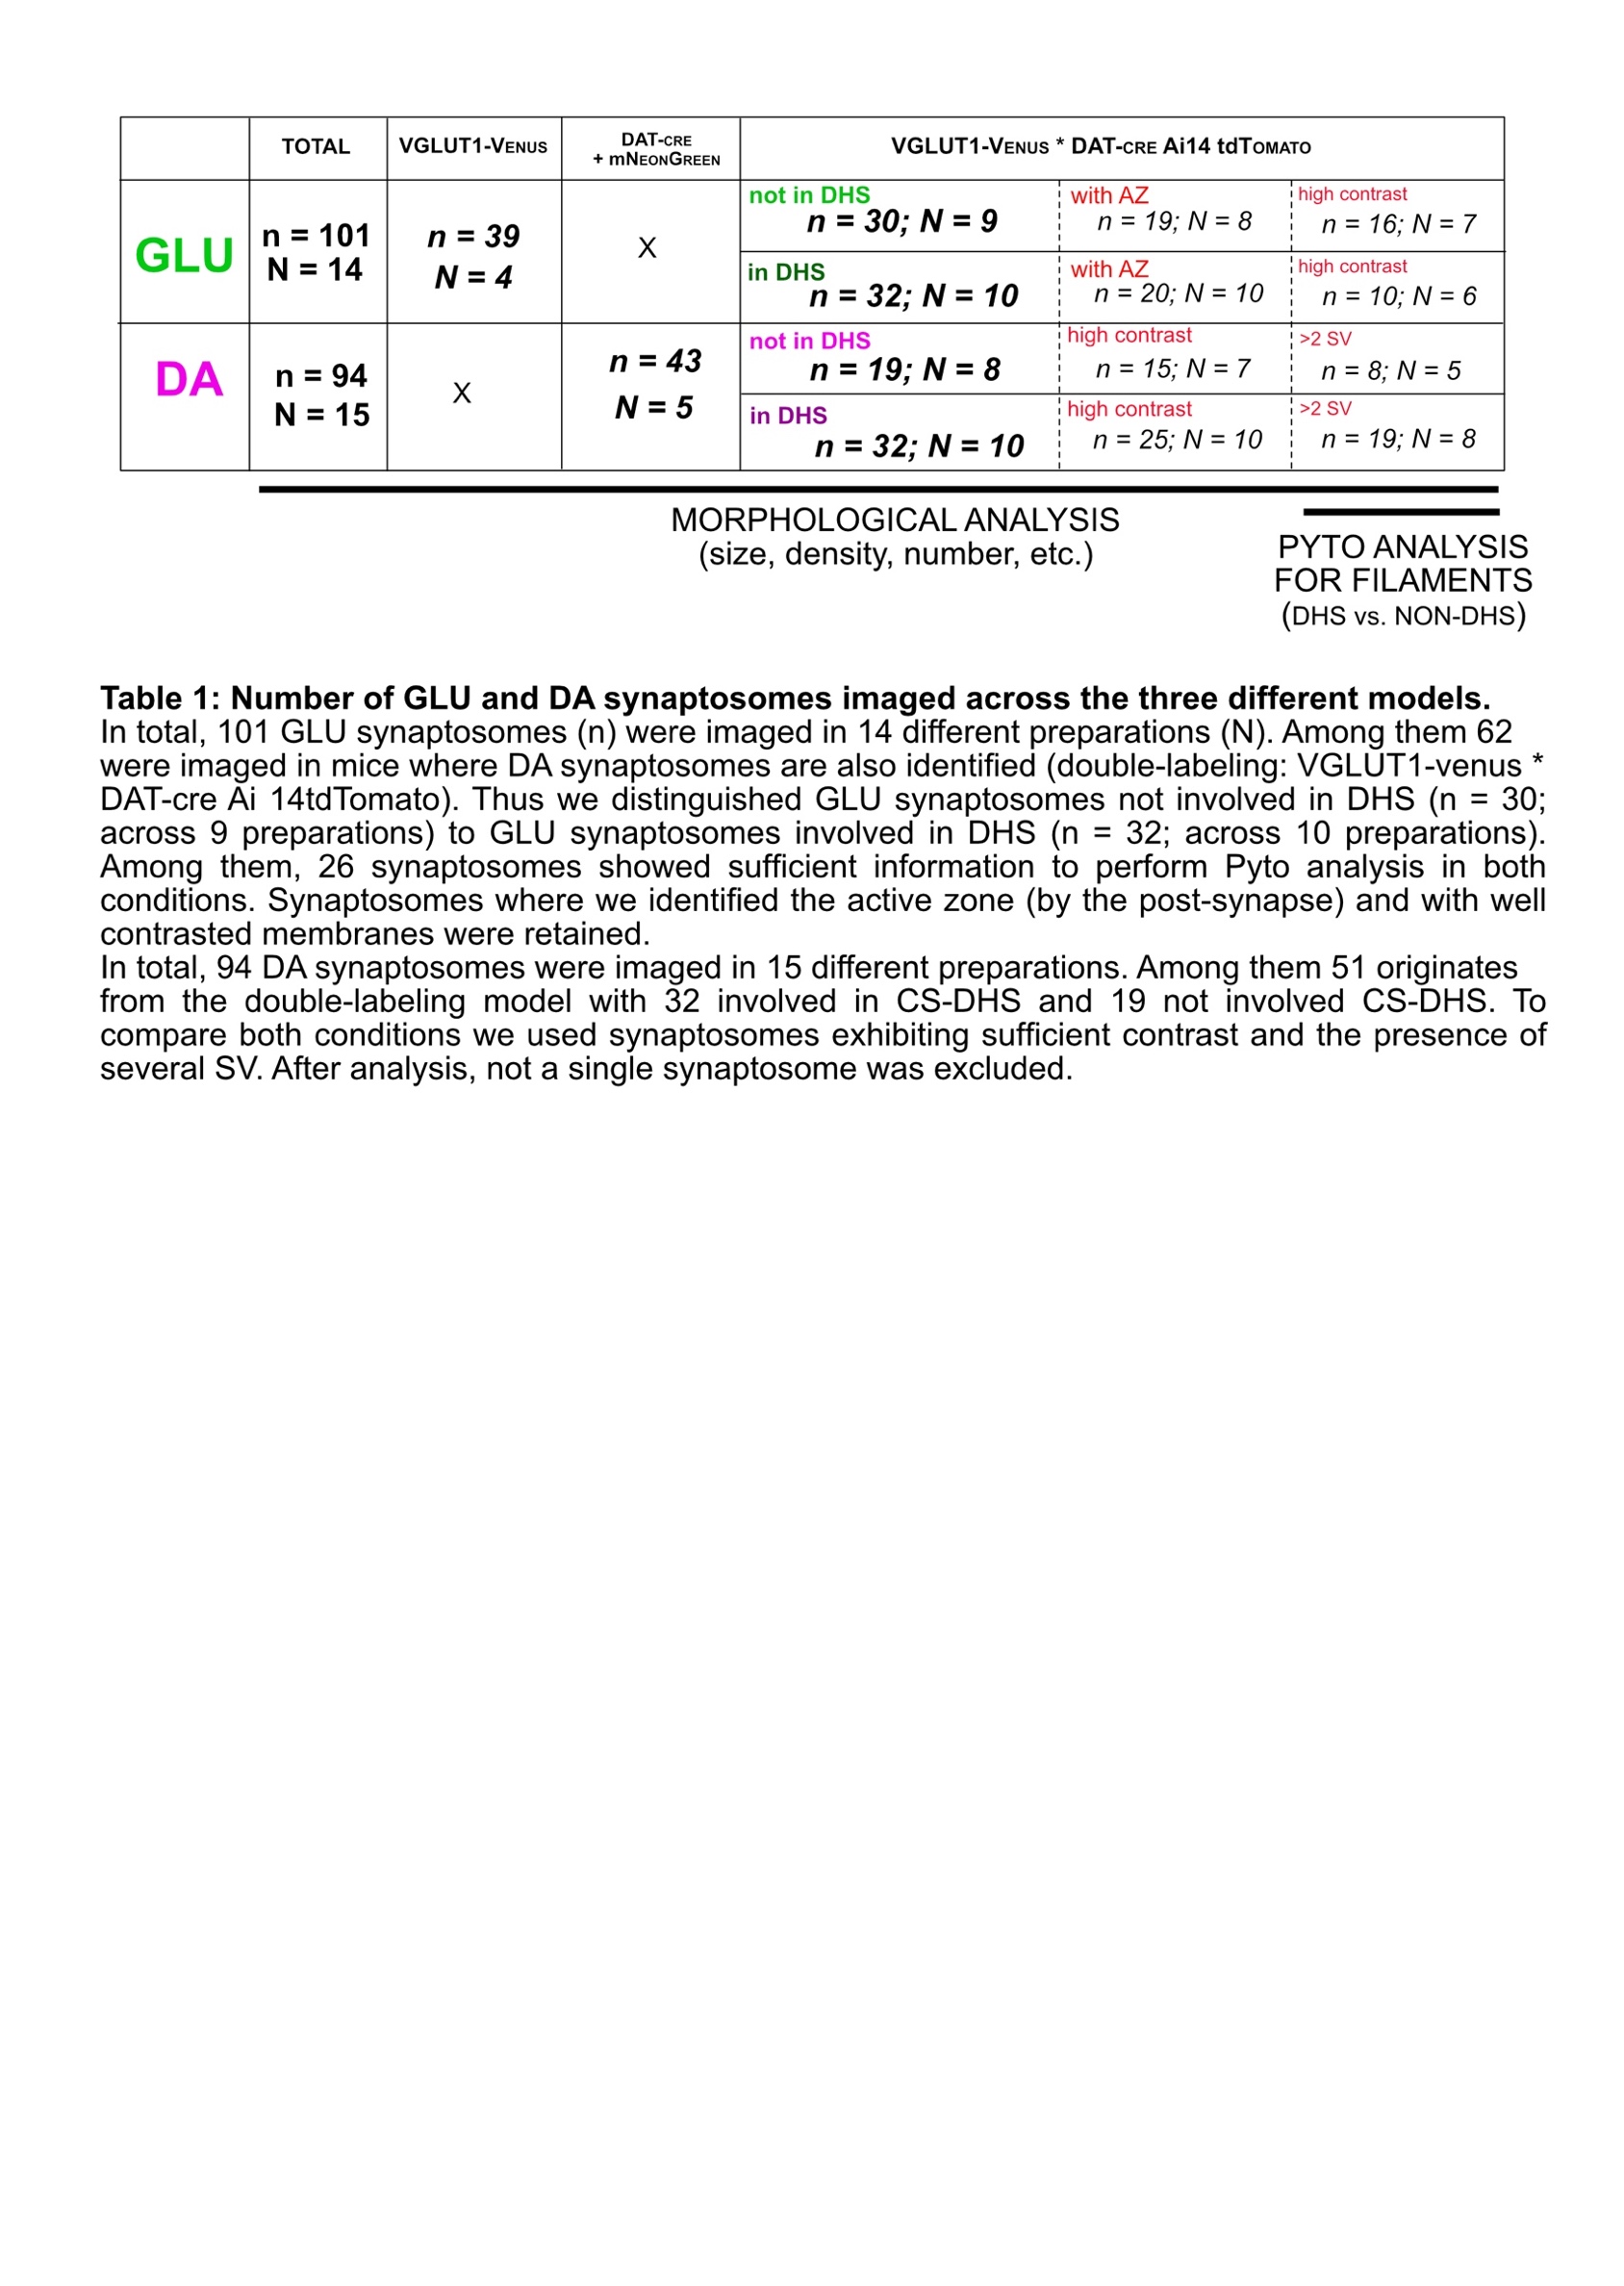


**Table 1: Number of GLU and DA synaptosomes imaged across the three different models.**

In total, 101 GLU synaptosomes (n) were imaged in 14 different preparations (N). Among them 62 were imaged in mice where DA synaptosomes are also identified (double-labeling: VGLUT1-venus * DAT-cre Ai 14tdTomato). Thus, we distinguished GLU synaptosomes not involved in DHS (n = 30; across 9 preparations) to GLU synaptosomes involved in DHS (n = 32; across 10 preparations). Among them, 26 synaptosomes showed sufficient information to perform Pyto analysis in both conditions. Synaptosomes where we identified the active zone (by the post-synapse) and with well contrasted membranes were retained.

In total, 94 DA synaptosomes were imaged in 15 different preparations. Among them 51 originates from the double-labeling model with 32 involved in CS-DHS and 19 not involved CS-DHS. To compare both conditions we used synaptosomes exhibiting sufficient contrast and the presence of several SV. After analysis, not a single synaptosome was excluded.


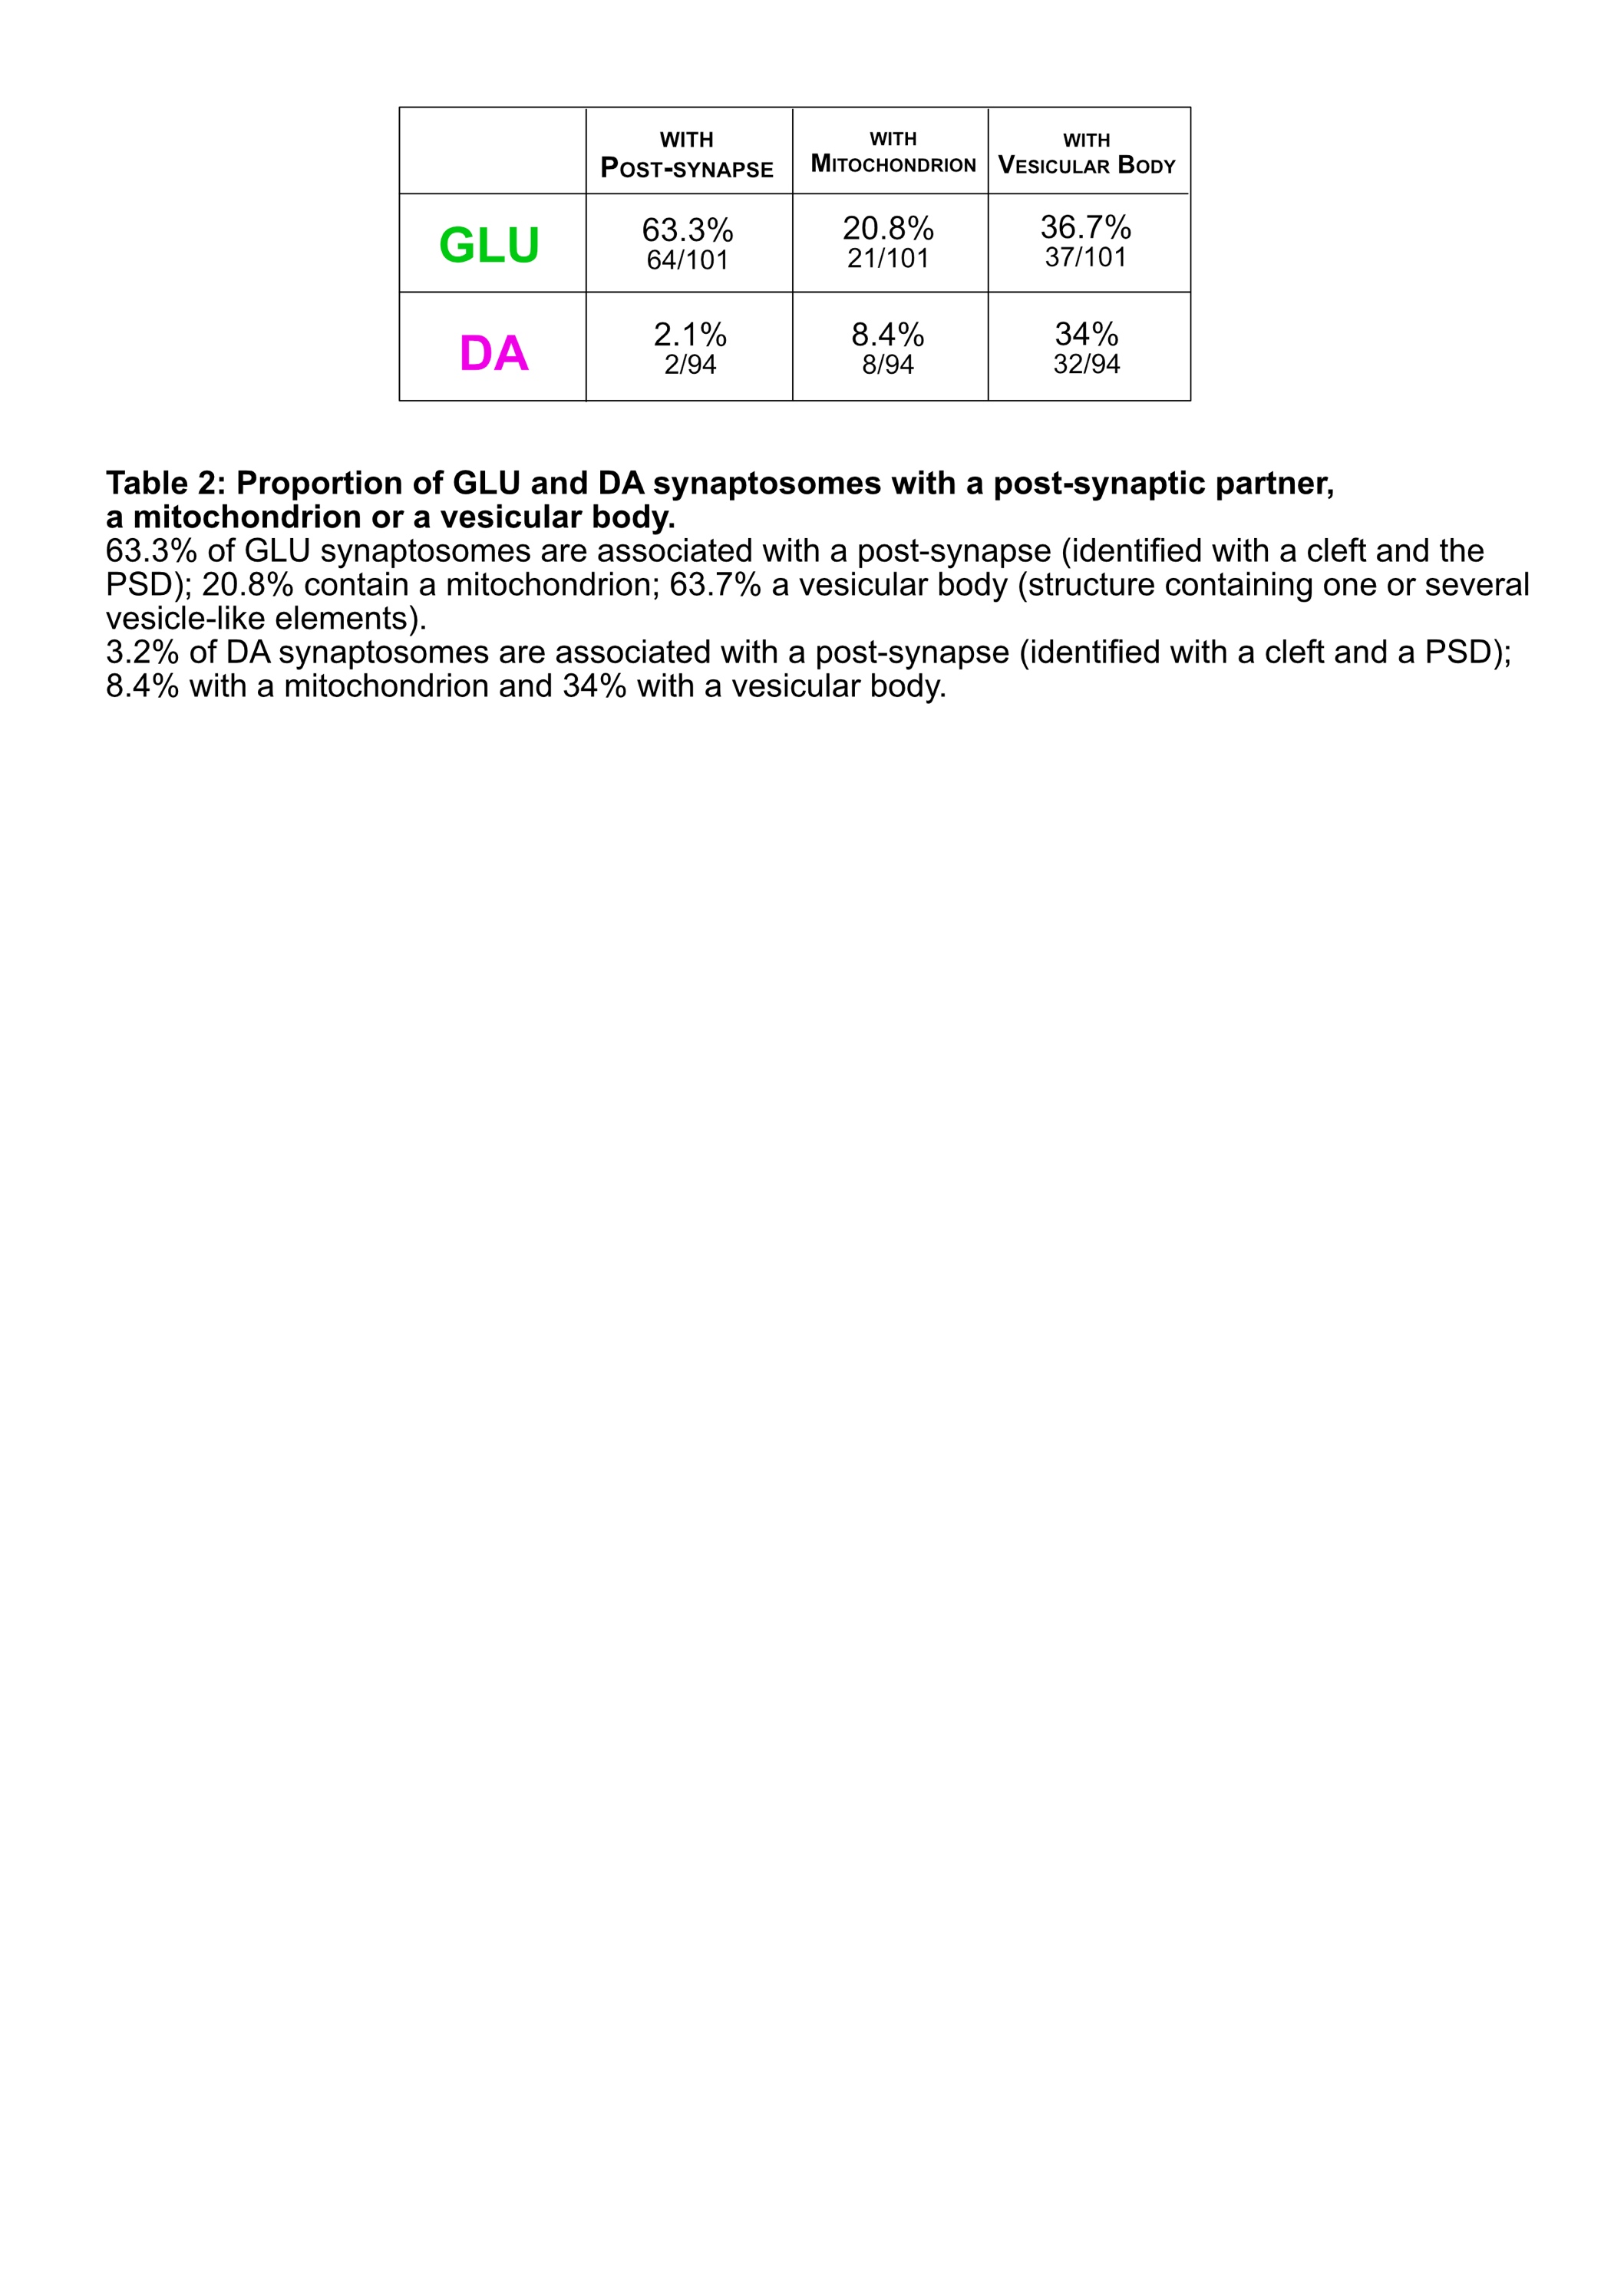


**Table 2: Proportion of GLU and DA synaptosomes with a post-synaptic element (PSE),**

**a mitochondrion or a vesicular body.**

63.3% of GLU synaptosomes are associated with a post-synapse (identified with a cleft and the PSD); 20.8% contain a mitochondrion; 63.7% a vesicular body (structure containing one or several vesicle-like elements). 2.1% of DA synaptosomes are associated with a post-synapse (identified with a cleft and a PSD); 8.4% with a mitochondrion and 34% with a vesicular body.

| **FIGURE** | **TEST** | **COMPARISONS** | **VALUES (MEAN and St. Dev.)** |
| --- | --- | --- | --- |
| **Figure 2C** *– max. extent synaptosomes GLU vs. DA* | Mann-Whitney | p-value <0.0001  **** | GLU : 823.23 (STD 262.2)  DA : 575.4 (STD 180.5) |
| **Figure 2D** *– visible volume synaptosomes GLU vs. DA* | Mann-Whitney | p-value < 0.0001  **** | GLU : 0.091577143 (STD 0.057267804)  DA :0.034151961 (STD 0.026001367) |
| **Figure 2E** *– number of vesicles GLU vs. DA* | Mann-Whitney | p-value < 0.0001  **** | GLU: 190.8 (STD 176.4)  DA: 29.67 (STD 70.39) |
| **Figure 2F** – *Density of vesicles GLU vs. DA* | Mann-Whitney | p-value < 0.0001  **** | GLU: 1956 (STD 1166)  DA: 723.3 (STD 721.2) |
| **Figure 2G** – *CFD vesicle diameter GLU vs. DA vs. DA PSE+* | Kolmogorov-Smirnov tests | GLU vs. DA: p-value < 0.0001 ****  GLU vs. DA PSE+: p-value <0.0001**** | GLU: 39.83 (STD 5.810)  DA: 44.85 (STD 9.930)  DA PSE+: 38.80 (STD 5.926) |
| **Figure 2H** – *CFD vesicle sphericity GLU vs. DA vs. DA PSE+* | Kolmogorov-Smirnov tests | GLU vs. DA: p-value < 0.0083 **  GLU vs DA PSE: 0.1744 ns | GLU : 0.9871 (STD 0.02883) n = 18 897  DA : 0.9752 (STD 0.059) n = 2782  DA PSE+ : 0.9924 (STD 0.01295) n = 649 |
| **Figure 3F** *– Mean area of AZ (GLU/PSE) or contact (DA/GLU or DA/PSE)* | Mann-Whitney | AZ vs. DA/GLU: 0.1009 ns  DA/GLU vs DA/PSE : 0.4242 ns | AZ : 0.079118 (STD 0.054978)  DA/GLU : 0.054103 (STD 0.03643)  DA/PSE : 0.062775  (STD 0.003880) |
| **Figure 3G** – *Mean cleft size of AZ (GLU/POST) or contact (DA/GLU or DA/PSE)* | Unpaired t-test  Mann-Whitney | AZ vs DA/GLU: <0.0001 ****  DA/GLU vs. DA/POST : 0.6630 ns | AZ : 31.82 (STD 6.237)  DA/GLU : 12.12 (STD 2.353)  DA/PSE : 13.25 (STD 3.307) |
| **Figure 4C** – *Percentage of proximal vesicles that are tethered GLU vs. DA* | t-test | p-value = 0.1334  ns | GLU: 0.40 (STD 0.37)  DA: 0.25 (STD 0.27) |
| **Figure 4D –** *Mean Tethers length GLU vs. DA* | t-test | p-value < 0.001  *** | GLU : 13.89 (STD 7.47)  DA : 22.43 (STD 12.21) |
| **Figure 4E** – *Number of tethers in function of the distance to the AZ or PM (GLU vs. DA)* | t-tests | <5: nan  5-10: 0.9341ns  10-20: 0.7776 ns  >20: 0.7699 ns | <5 GLU: 3.07 (STD 1.10)  <5 DA: nan  5-10 GLU: 1.77 (STD 1.19)  5-10 DA: 1.82 (STD 1.94)  10-20 GLU: 0.33 (STD 0.55)  10-20 DA: 0.38 (STD 0.64)  >20 GLU: 0.11 (STD 0.32)  >20 DA: 0.09 (STD 0.28) |
| **Figure 4J** *– Percentage of all vesicles that are connected GLU vs. DA* | t-test | p-value = 0.0004  *** | GLU: 0.53 (STD 0.33)  DA: 0.20 (STD 0.28) |
| **Figure 4K** – *Mean connector length GLU vs. DA* | t-test | p-value = 0.0021  ** | GLU: 18.50 (STD 9.18)  DA: 16.33 (STD 13.07) |
| **Figure 4L** – *Percentage of proximal vesicles tethered or not and connected or not GLU vs. DA* | Chi-squared test | p-value = 0.0008  *** | GLU T+/C+: 0.171  DA T+/C+: 0.064  GLU T+/C-: 0.366  DA T+/C-: 0.202  GLU T-/C+: 0.183  DA T-/C+: 0.170  GLU T-/C-: 0.280  DA T-/C-: 0.564 |
| **Figure 5B** – *Mean number of vesicles DA T+ vs. DA T-* | Mann Whitney | p-value = 0.0068  ** | DA T+: 43.15 (STD 32.02)  DA T-: 18.05 (STD 25.32) |
| **Figure 5C** – *Mean maximal diameter DA T+ vs. DA T-* | Mann Whitney | p-value = 0.0401  * | DA T+ : 722.9 (STD 205.4)  DA T- : 583.8 (STD 165.8) |
| **Figure 5G** – *Number of proximal vesicle per µm2 in function of the distance to the plasma membrane* | t-tests | 0-5: nan  5-10 = 0.0266 *  10-15 = 0.1306 ns  15-20 = 0.1586 ns  20-45 = 0.6966 ns | 0-5 T+: nan  0-5 T-: nan  5-10 T+: 1.62 (STD 2.16)  5-10 T-: 0.19 (STD 0.69)  10-15 T+: 2.62 (STD 3.12)  10-15 T-: 1.01 (STD 2.18)  15-20 T+: 3.20 (STD 3.50)  15-20 T-: 1.42 (STD 2.85)  20-45 T+: 2.72 (STD 2.25)  20-45 T-: 3.56 (STD 7.35) |
| **Figure 6C** – *Mean number of vesicles GLU DA – vs. GLU DA+* | Mann Whitney | p-value = 0.8640  ns | GLU DA-: 205.7 (STD 195.3)  GLU DA+: 222.9 (STD 214.5) |
| **Figure 6D** – *Mean density of vesicle in GLU DA+ vs. GLU DA-* | Mann Whitney | p-value = 0.5768  ns | GLU DA+: 1943 (STD 1314)  GLU DA-: 1893  (STD 772.9) |
| **Figure 6E** – *Mean active zone area GLU DA+ vs. GLU DA-* | t-test | p-value = 0.4974  ns | GLU DA-: 0.06 (STD 0.03)  GLU DA+: 0.07 (STD 0.04) |
| **Figure 6F** – *Vesicle occupancy from the AZ between GLU DA+ and GLU DA-*  *Histogram of binned values not shown* | t-test, binned values | 0-45 = 0.0215 *  75-150 = 0.0195 *  150-250 = 0.0016 ** | GLU DA-: 0.03 (STD 0.02)  GLU DA+: 0.05 (STD 0.03)  GLU DA-: 0.10 (STD 0.02)  GLU DA+: 0.07 (STD 0.02)  GLU DA-: 0.11 (STD 0.02)  GLU DA+: 0.08 (STD 0.02) |
| **Figure 6H** - *Percentage of proximal vesicles that are tethered GLU DA- vs. GLU DA+* | t-test | p-value = 0.1602  ns | GLU DA-: 0.31 (STD 0.38)  GLU DA+: 0.52 (STD 0.33) |
| **Figure 6I** – *Number of tethers in function of the distance to the AZ on GLU DA- vs. GLU DA+* | t-tests | <5: 0.4638 ns  5-10: 0.5421 ns  >10: 0.4816 ns | <5 GLU DA-: 3.33 (STD 1.63)  <5 GLU DA+: 2.89 (STD 0.60)  5-10 GLU DA-: 1.83 (STD 0.75)  5-10 GLU DA+: 2.15 (STD 1.14)  >10 GLU DA-: 1.00 (STD 0.0)  >10 GLU DA+: 1.20 (STD 0.45) |
| **Figure 6J** – *Percentage of proximal vesicles that are connected* | t-test | p-value = 0.0167  * | GLU DA-: 0.216 (STD 0.38 ; SEM 0.10)  GLU DA+: 0.467 (STD 0.30 ; SEM 0.09) |
| **Figure 6K** – *Percentage of proximal vesicles tethered or not and connected or not in GLU DA- vs. GLU DA+* | Chi-squared test | p-value = 0.0435  * | T+/C+ GLU DA-: 0.0054  T+/C+ GLU DA+: 0.0267  T+/C- GLU DA-: 0.405  T+/C- GLU DA+: 0.333  T-/C+ GLU DA-: 0.162  T-/C+ GLU DA+: 0.200  T-/C- GLU DA-: 0.378  T-/C- GLU DA+: 0.200 |
| **Figure S1B** – *Loading capacity of FM4-64* | Mann Whitney | p-value < 0.0001  **** | KCl: 2.136 (STD 3.960)  Ctl: 1.073 (STD 3.513) |
| **Figure S1C** – Release capacity of FM4-64 | Mann Whitney | p-value < 0.0001  **** | KCl: 2.102 (STD 1.865)  Ctl: 0.9745 (STD 1.497) |
| **Figure S9B** – *Mean maximal diameter DA in CS-DHS vs. DA not in CS-DHS* | Mann-Whitney | p-value = 0.5004  ns | DA not in CS-DHS: 619.6 (STD 182.9)  DA in CS-DHS: 667.5 (STD 219.2) |
| **Figure S9C** – *Mean number of vesicles DA in CS-DHS vs. DA not in CS-DHS* | Mann-Whitney | p-value = 0.6238  ns | DA not in CS-DHS: 28.00 (STD 27.92)  DA in CS-DHS: 33.39 (STD 54.98) |
| **Figure S9D** – *Mean number of proximal vesicles* | t-test | p-value = 0.3815  ns | DA not in CS-DHS: 4.62 (STD 3.66)  DA in CS-DHS: 3.32 (STD 3.42) |
| **Figure S9E** – *Fraction of proximal vesicles tethered* | t-test | p-value = 0.3815  ns | DA not in CS-DHS: 0.297 (STD 14.03)  DA in CS-DHS: 0.222 (STD 0.29) |
| **Figure S9F** – *mean tether length* | t-test | p-value = 0.1725  ns | DA not in CS-DHS: 20.19 (STD 0.23)  DA in CS-DHS: 25.42 (STD 8.76) |
| **Figure S9G** – *Fractions of vesicles in function of the distance to the PM* | t-tests | 0-45: p-value = 0.6351 ns  45-75: p-value 0.9491 ns  75-150: p-value = 0.8804 ns  150-250: p-value = 0.5737 ns | 0-45 DA not in CS-DHS: 0.01 (STD 0.01)  0-45 DA in CS-DHS: 0.01 (STD 0.01)  45-75 DA not in CS-DHS: 0.04 (STD 0.03)  45-75 DA in CS-DHS: 0.04 (STD 0.03)  75-150 DA not in CS-DHS: 0.03 (STD 0.02)  75-150 DA in CS-DHS: 0.04 (STD 0.02)  150-250 DA not in CS-DHS: 0.03 (STD 0.03)  150-250 DA in CS-DHS: 0.04 (STD 0.02) |
| **Figure S9H** – *Mean connector length* | t-test | p-value 0.0004  *** | DA not in CS-DHS: 21.42 (STD 11.68)  DA in CS-DHS: 14.29 (STD 13.01) |

**Table 3**. List of statistical tests used in this study.
